# Supplementary material for: PROcalcitonin and NEWS2 evaluation for Timely identification of sepsis and Optimal use of antibiotics in the emergency department (PRONTO): protocol for a multicentre, open-label, randomised controlled trial
Source: PubMed Central journal article supplement — BMJ Open. 2022 Jun 12;12(6):e063424. doi: 10.1136/bmjopen-2022-063424 (PMC9196199; doi:10.1136/bmjopen-2022-063424), 2022-06-12
Supplement: bmjopen-2022-063424.draft_revisions.pdf [file bmjopen-2022-063424.draft_revisions.pdf]

# BMJ Open

BMJ Open is committed to open peer review. As part of this commitment we make the peer review history of every article we publish publicly available.

When an article is published we post the peer reviewers' comments and the authors' responses online. We also post the versions of the paper that were used during peer review. These are the versions that the peer review comments apply to.

The versions of the paper that follow are the versions that were submitted during the peer review process. They are not the versions of record or the final published versions. They should not be cited or distributed as the published version of this manuscript.

BMJ Open is an open access journal and the full, final, typeset and author-corrected version of record of the manuscript is available on our site with no access controls, subscription charges or pay-per-view fees (<http://bmjopen.bmj.com>).

If you have any questions on BMJ Open's open peer review process please email [info.bmjopen@bmj.com](mailto:info.bmjopen@bmj.com)

# BMJ Open

## Protocol for PROcalcitonin and NEWS2 evaluation for Timely identification of sepsis and Optimal use of antibiotics in the emergency department (PRONTO): a multicentre open label randomised controlled trial

|                               |                                                                                                                                                                                                                                                                                                                                                                                                                                                                                                                                                                                                                                                                                                                                                                                                                                                                                                                                                                                                                                                                                                                                                                                                                                                                                                                                                                                                                                                                                                                                                                                                                                                                                                                                                                                                                                        |
|-------------------------------|----------------------------------------------------------------------------------------------------------------------------------------------------------------------------------------------------------------------------------------------------------------------------------------------------------------------------------------------------------------------------------------------------------------------------------------------------------------------------------------------------------------------------------------------------------------------------------------------------------------------------------------------------------------------------------------------------------------------------------------------------------------------------------------------------------------------------------------------------------------------------------------------------------------------------------------------------------------------------------------------------------------------------------------------------------------------------------------------------------------------------------------------------------------------------------------------------------------------------------------------------------------------------------------------------------------------------------------------------------------------------------------------------------------------------------------------------------------------------------------------------------------------------------------------------------------------------------------------------------------------------------------------------------------------------------------------------------------------------------------------------------------------------------------------------------------------------------------|
| Journal:                      | <i>BMJ Open</i>                                                                                                                                                                                                                                                                                                                                                                                                                                                                                                                                                                                                                                                                                                                                                                                                                                                                                                                                                                                                                                                                                                                                                                                                                                                                                                                                                                                                                                                                                                                                                                                                                                                                                                                                                                                                                        |
| Manuscript ID                 | bmjopen-2022-063424                                                                                                                                                                                                                                                                                                                                                                                                                                                                                                                                                                                                                                                                                                                                                                                                                                                                                                                                                                                                                                                                                                                                                                                                                                                                                                                                                                                                                                                                                                                                                                                                                                                                                                                                                                                                                    |
| Article Type:                 | Protocol                                                                                                                                                                                                                                                                                                                                                                                                                                                                                                                                                                                                                                                                                                                                                                                                                                                                                                                                                                                                                                                                                                                                                                                                                                                                                                                                                                                                                                                                                                                                                                                                                                                                                                                                                                                                                               |
| Date Submitted by the Author: | 31-Mar-2022                                                                                                                                                                                                                                                                                                                                                                                                                                                                                                                                                                                                                                                                                                                                                                                                                                                                                                                                                                                                                                                                                                                                                                                                                                                                                                                                                                                                                                                                                                                                                                                                                                                                                                                                                                                                                            |
| Complete List of Authors:     | <p>Euden, joanne; Cardiff University, Centre for Trials Research<br/> Thomas-Jones, Emma; Cardiff University, Centre for Trials Research<br/> Aston, Stephen; University of Liverpool, Institute of Infection, Veterinary and Ecological Sciences<br/> Brookes-Howell, Lucy; Cardiff University, Centre for Trials Research<br/> Carman, Julie; PPI representative<br/> Carrol, Enitan; University of Liverpool, Institute of Infection, Veterinary and Ecological Sciences<br/> Gilbert, Stephanie; Cardiff University, Centre for Trials Research<br/> Howard, P; University of Leeds, School of Healthcare, Faculty of Medicine and Health<br/> Hood, Kerenza; Cardiff University, Centre for trials Research<br/> Inada-Kim, Matthew; Hampshire Hospitals NHS Foundation Trust, Acute Medicine; University of Southampton, NHS England and NHS Improvement<br/> Llewelyn, Martin; Brighton and Sussex Medical School, Infectious Diseases and Therapeutics<br/> McGill, Fiona; Leeds Teaching Hospitals NHS Trust<br/> Milosevic, Sarah; Cardiff University, Centre for Trials Research<br/> Niessen, Louis; Liverpool School of Tropical Medicine, Health Economics; Johns Hopkins, School of Public Health<br/> Nsutebu, Emmanuel; Sheikh Shakhbout Medical City<br/> Pallmann, Philip; Cardiff University, Centre for Trials Research<br/> Schmidt, Paul; Portsmouth Hospitals NHS Trust<br/> Taylor-Robinson, David; University of Liverpool, Department of Public Health, Policy and Systems<br/> Welters, Ingeborg; University of Liverpool, Institute for Life Course and Medical Sciences<br/> Todd, Stacy; Royal Liverpool and Broadgreen University Hospitals NHS Trust, Tropical and Infectious Disease Unit<br/> French, Neil; University of Liverpool, Institute of Infection, Veterinary and Ecological Sciences</p> |
| Keywords:                     | ACCIDENT & EMERGENCY MEDICINE, Infection control < INFECTIOUS DISEASES, Adult intensive & critical care < INTENSIVE & CRITICAL CARE                                                                                                                                                                                                                                                                                                                                                                                                                                                                                                                                                                                                                                                                                                                                                                                                                                                                                                                                                                                                                                                                                                                                                                                                                                                                                                                                                                                                                                                                                                                                                                                                                                                                                                    |
|                               |                                                                                                                                                                                                                                                                                                                                                                                                                                                                                                                                                                                                                                                                                                                                                                                                                                                                                                                                                                                                                                                                                                                                                                                                                                                                                                                                                                                                                                                                                                                                                                                                                                                                                                                                                                                                                                        |

1  
2  
3  
4  
5  
6  
7  
8  
9  
10  
11  
12  
13  
14  
15  
16  
17  
18  
19  
20  
21  
22  
23  
24  
25  
26  
27  
28  
29  
30  
31  
32  
33  
34  
35  
36  
37  
38  
39  
40  
41  
42  
43  
44  
45  
46  
47  
48  
49  
50  
51  
52  
53  
54  
55  
56  
57  
58  
59  
60

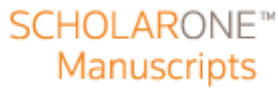

1  
2  
3  
4  
5  
6  
7  
8  
9  
10  
11  
12  
13  
14  
15  
16  
17  
18  
19  
20  
21  
22  
23  
24  
25  
26  
27  
28  
29  
30  
31  
32  
33  
34  
35  
36  
37  
38  
39  
40  
41  
42  
43  
44  
45  
46  
47  
48  
49  
50  
51  
52  
53  
54  
55  
56  
57  
58  
59  
60

# Title: Protocol for PROcalcitonin and NEWS2 evaluation for Timely identification of sepsis and Optimal use of antibiotics in the emergency department (PRONTO): a multicentre open label randomised controlled trial

Joanne Euden<sup>1</sup> (**corresponding author**), Emma Thomas-Jones<sup>1</sup>, Stephen Aston<sup>2</sup>, Lucy Brookes-Howell<sup>1</sup>, Julie Carman<sup>3</sup>, Enitan D Carrol<sup>2</sup>, Stephanie Gilbert<sup>1</sup>, Philip Howard<sup>4</sup>, Kerry Hood<sup>1</sup>, Matthew Inada-Kim<sup>5</sup>, Martin J Llewelyn<sup>6</sup>, Fiona McGill<sup>7</sup>, Sarah Milosevic<sup>1</sup>, Louis Niessen<sup>8</sup>, Emmanuel Nsutebu<sup>9</sup>, Philip Pallmann<sup>1</sup>, Paul Schmidt<sup>10</sup>, David Taylor-Robinson<sup>11</sup>, Ingeborg Welters<sup>12</sup>, Stacy Todd\*<sup>13</sup> Neil French\*<sup>2</sup> on behalf of the PRONTO team.

## Author Affiliations

<sup>1</sup> Centre for Trials Research, College of Biomedical and Life Sciences, Cardiff University, Cardiff, UK

<sup>2</sup> Institute of Infection, Veterinary and Ecological Sciences, University of Liverpool, Liverpool, UK

<sup>3</sup> Public and Patient Representative

<sup>4</sup> School of Healthcare, Faculty of Medicine and Health, University of Leeds, Leeds, UK

<sup>5</sup> Royal Hampshire County Hospital, Hampshire Hospitals NHS Foundation Trust, Hampshire, UK. University of Southampton, NHS England and NHS Improvement

<sup>6</sup> Brighton and Sussex Medical School, University of Sussex, Brighton BN1 9PS, UK

<sup>7</sup> St James's University Hospital, Leeds Teaching Hospitals NHS Trust, Leeds, UK

<sup>8</sup> Liverpool School of Tropical Medicine, Liverpool, UK;

<sup>9</sup> Sheikh Shakhbout Medical City, Abu Dhabi, United Arab Emirates

<sup>10</sup> Queen Alexandra Hospital, Portsmouth Hospitals NHS Trust, Portsmouth, UK

<sup>11</sup> Department of Public Health, Policy and Systems, University of Liverpool, Liverpool, UK

<sup>12</sup> Institute for Life Course and Medical Sciences, University of Liverpool, Liverpool, UK

<sup>13</sup> Tropical and Infectious Disease Unit, Liverpool University Hospitals NHS Foundation Trust, Liverpool, UK

\*Dr S. Todd and Professor N. French are co-Chief Investigators.

## Corresponding Author Information

Joanne Euden [eudenj@cardiff.ac.uk](mailto:eudenj@cardiff.ac.uk)

Address: 7<sup>th</sup> floor Neuadd Meirionnydd, Heath Park, Cardiff, CF14 4YS

**Word Count 3,837 (excluding tables and acknowledgements)**

## ABSTRACT

**Introduction:** Sepsis is a common, potentially life-threatening complication of infection. The optimal treatment for sepsis includes prompt antibiotics and intravenous fluids, facilitated by its early and accurate recognition. Currently, clinicians identify and assess severity of suspected sepsis using validated clinical scoring systems. In England, the National Early Warning Score 2 (NEWS2) has been mandated across all NHS trusts and ambulance organisations. Like many clinical scoring systems, NEWS2 should not be used without clinical judgement to determine either the level of acuity or a diagnosis. Despite this, there is a tendency to over-emphasise the score in isolation in patients with suspected infection, leading to the over-prescription of antibiotics, and potentially treatment-related complications and rising antimicrobial resistance. The biomarker procalcitonin (PCT) has been shown to be useful in specific circumstances to support appropriate antibiotics prescribing by identifying bacterial infection. PCT is not routinely used in the care of undifferentiated patients presenting to emergency departments (EDs), and the evidence-base of its optimal usage is poor. The PRONTO study is a randomised controlled trial in adults with suspected sepsis presenting to the ED to compare standard clinical management based on NEWS2 scoring plus PCT guided risk assessment with standard clinical management based on NEWS2 scoring alone and compare if this approach reduces prescriptions of antibiotics without increasing mortality.

**Methods and analysis:** PRONTO is a parallel two-arm open-label individually Randomised Controlled Trial (RCT) set in NHS EDs in the UK. Participants will be randomised in a ratio of 1:1 to standard clinical management based on NEWS2 scoring or standard clinical management based on NEWS2 scoring plus PCT guided risk assessment. This trial has two co-primary endpoints. We will compare whether the addition of PCT measurement to NEWS2 scoring can lead to a reduction in intravenous antibiotic initiation in ED patients managed as suspected sepsis, with at least no increase in 28-day mortality compared to NEWS2 scoring alone (in conjunction with local standard care pathways). The study has an internal pilot phase and group-sequential stopping rules for effectiveness and futility/safety, as well as a qualitative sub-study and a health economic evaluation.

**Ethics and dissemination:** The trial protocol was approved by the HRA and NHS REC (Wales Research Ethics Committee 2, reference 20/WA/0058). Findings will be disseminated through peer-reviewed journals and presented at scientific conferences.

**Trial registration number:** ISRCTN 54006056

### Strengths of this study

- This pragmatic study aims to directly address the question of whether antibiotics can safely be given within 3 hours rather than the current one-hour target of international sepsis guidelines.
- It is designed to integrate into routine UK clinical pathways and includes assessment of acceptability and practicality in emergency department settings.
- Explicit inclusion of COVID-19 into the study design to try and reduce the amount of antibiotics administered to patients presenting with acute SARS-CoV-2 infection.

- Co-primary outcome to assess effectiveness as a stewardship intervention but also to ensure safety, combined into an innovative group-sequential design.

**Protocol version:** PRONTO Protocol 2.1 27.01.22

**Keywords:** Emergency departments, sepsis, antibiotic stewardship, procalcitonin

## INTRODUCTION

Sepsis is defined as life-threatening organ dysfunction caused by a dysregulated host response to infection [1] and is a medical emergency requiring prompt antimicrobial therapy and physiological support. The identification, assessment and management of sepsis is challenging because of its many non-specific symptoms and signs, which can be caused by both infectious and non-infectious diseases. In line with international recommendations, the UK National Institute for Health and Care Excellence (NICE) sepsis guidelines suggest the administration of intravenous antibiotics within an hour in patients at risk of Intensive Care Unit (ICU) admission and death [2]. However, up to 50% of patients initially managed as sepsis in the emergency department (ED) do not have a final diagnosis of sepsis [3 4] and often do not have an infection [5 6]. The current approach leads to overuse of antibiotics with the associated risk of antimicrobial resistance (AMR), antibiotic-related adverse drug reactions (e.g. *C. difficile* infection) [7], and extended hospital stays.

The challenge of delivering high quality sepsis care in an ED setting has been well recognised [8 9]. The third international consensus definition (Sepsis 3) [1] recommended use of the quick Sequential Organ Failure Assessment (qSOFA) score, to identify patients at high risk of death and prolonged ICU stay. NEWS and NEWS2 are rapid physiology-based scoring systems which are used to detect and track the deteriorating patient. NEWS has been demonstrated to have better diagnostic accuracy to qSOFA in detection of severe outcomes in sepsis [10 11]. However, with its higher sensitivity comes reduced specificity which can result in significant increased numbers of patients being managed as high risk for suspected sepsis with a corresponding pressure on ED departments. NEWS2 replaced NEWS scoring system as the standard monitoring tool in the NHS in 2019 [12] and has been found to be comparable or superior to NEWS [13-16]. In October 2021, Surviving Sepsis Campaign recommended that immediate antibiotics (within one hour) should be targeted to those with septic shock and others with suspected sepsis could wait for up to three hours for initial assessment to target antimicrobial choice or identify non-infectious mimics [17].

The emergence of COVID-19 has exacerbated this previously highlighted problem. COVID-19 is a viral infection which presents within the sepsis syndrome constellation. Secondary bacterial infections are uncommon at presentation to ED (3.5%) [19], despite this up to 83% of patients with COVID-19 received antibiotics [20 21]. NEWS2 scores are broadly predictive of COVID-19 outcome on presentation but does not appear to be predictive of bacterial co-infection [18]. Initial investigations in the ED can be helpful in distinguishing between COVID-19 and bacterial pneumonia including typical radiographic change, and COVID-19 point-of-care diagnostics [8]. These results would be available within three hours for assessment and could potentially reduce unnecessary antimicrobial usage in COVID-19 management.

1  
2  
3 Procalcitonin (PCT) is a reliable biomarker that changes early in the course of bacterial infection. A  
4 recent PCT is currently the biomarker with the most available evidence to identify bacterial infections  
5 and inform antibiotic prescription decisions. Cochrane meta-analysis [9] demonstrated that the use of  
6 PCT to guide antibiotic treatment in patients with acute respiratory infections reduced antibiotic  
7 exposure and side-effects, and improved survival. Nevertheless, while the US FDA has approved PCT  
8 assays for use in sepsis, current UK NICE guidance does not recommend PCT use on the basis of  
9 insufficient evidence [22 23]. PCT predictive of outcome in COVID-19, and this may be because of its  
10 ability to identify superadded bacterial infection [10 11 24]. The available evidence suggests a low PCT  
11 will have good negative predictive value for a bacterial co-infection in cases of COVID-19 [27].  
12  
13  
14  
15  
16  
17  
18

## 19 **AIMS AND OBJECTIVES:**

### 20 **Primary Objective:**

21  
22 To assess whether the addition of Procalcitonin (PCT) measurement to NEWS2 scoring leads to a  
23 reduction in IV antibiotic initiation at three hours, with no increase in 28-day mortality compared to  
24 NEWS2 scoring alone in the management of patients presenting to hospital EDs in England and Wales  
25 with suspected sepsis.  
26  
27  
28  
29  
30  
31

### 32 **Secondary Objective:**

33  
34 The assessment of a) feasibility, b) cost-effectiveness and c) acceptability to healthcare practitioners,  
35 patients and their family  
36  
37  
38  
39  
40

## 41 **METHODS AND ANALYSIS**

### 42 **Study design**

43  
44 PRONTO is a multi-centre, parallel two-arm, open-label, individually randomised controlled trial with  
45 two co-primary endpoints, an internal pilot phase and group-sequential stopping rules for effectiveness  
46 and futility/safety. Participants will be randomised in a ratio of 1:1 to standard clinical management  
47 based on NEWS2 scoring or standard clinical management based on NEWS2 scoring plus PCT guided  
48 risk assessment.  
49  
50  
51  
52  
53  
54

### 55 **Internal Pilot**

56  
57 An internal pilot phase will be conducted over the first nine months of the recruitment period with ten  
58 lead sites. Predefined progression criteria will be used to assess feasibility to progress to the full trial,  
59  
60

1  
2  
3 such as site and patient absolute recruitment and consent rate, proportion of patients undergoing PCT  
4 assessments and the ability to collect co-primary outcome data.  
5

## 6 7 **Eligibility**

### 8 9 **Inclusion Criteria**

10  
11 Up to 20 EDs from across England and Wales will recruit adults ( $\geq 16$  years) who are being managed  
12 as suspected sepsis over a 24-month period. There is no minimum NEWS2 score for inclusion into the  
13 study.  
14  
15

### 16 17 18 19 20 **Exclusion criteria**

21  
22 Patients already receiving intravenous (IV) antibiotics, currently receiving myeloablative  
23 chemotherapy, patients with solid organ transplantation, allogeneic bone marrow or stem cell  
24 transplantation within 3 months prior to consent or patients known to require urgent surgical  
25 intervention at the time of randomisation.  
26

27  
28 Patients with an advance directive to withhold life-sustaining treatment or patients not wishing to  
29 receive cardiopulmonary resuscitation (CPR) may qualify provided they receive all other resuscitative  
30 measures e.g. respiratory support and fluid resuscitation.  
31  
32

### 33 34 **Study Procedures**

35  
36 The trial schema is shown in Figure 1.  
37  
38

### 39 40 **Identification and Screening**

41  
42 Patients with suspected sepsis will be identified at ED triage. After initial NEWS2 scoring and  
43 assessment according to current standard of care the eligibility criteria will be assessed and if no  
44 exclusion criteria apply, patients will be enrolled into the trial and randomised. A screening log of all  
45 eligible and randomised patients will be kept at each site so that any biases from differential recruitment  
46 will be detected.  
47

### 48 49 **Randomisation**

50  
51 Participants will be individually randomised in a 1:1 ratio by delegated research staff within the ED to  
52 either to standard clinical management based on NEWS2 scoring (control) or standard clinical  
53 management based on NEWS2 scoring plus PCT guided risk assessment (intervention). We will use  
54 minimisation with NEWS2 score ( $\geq$  or  $<$  5) and site as balancing factors and add a random element to  
55 reduce the risk of subversion[28]. This will be implemented in a secure 24-hour web-based  
56 randomisation programme controlled centrally by the Centre for Trials Research (CTR) in Cardiff. Full  
57 details are provided in the PRONTO randomisation strategy.  
58  
59  
60



## Trial Intervention

The BRAHMS PCT-direct reader (ThermoFisher Diagnostics Ltd, (Altrincham, Cheshire, UK) is a fully validated, CE-marked point-of-care test to determine levels of PCT in the blood. The test requires 20 µl blood which will be obtained from either venous blood during standard care procedures at triage or via a finger-prick. This will be used in combination with NEWS2 assessment of adult patients with suspected sepsis in ED, using a guidance-only algorithm for clinicians (Figure 1). The risk algorithm categorises individuals as low, medium or high risk, interpretation and management (table 1). Clinicians have oversight at all times as to whether to adhere to the algorithm As currently mandated in UK, NICE clinical guidelines and quality standard QS161 [29], urgent senior review within an hour will take place should any healthcare provider identify at least one risk factor indicating high risk of progression to severe illness or death regardless of underlying aetiology. This equates to a NEWS2  $\geq 5$  or an individual having a single feature of the evidence-based ‘NICE high-risk criterion’.

| Risk Group | Interpretation                                                                                                                                                                                                                                                                                                                     |
|------------|------------------------------------------------------------------------------------------------------------------------------------------------------------------------------------------------------------------------------------------------------------------------------------------------------------------------------------|
| High       | High risk of progression to sepsis. Likely benefit from immediate antibiotics (within 1 hour)                                                                                                                                                                                                                                      |
| Medium     | Medium risk of progression to sepsis. likely benefit from early antibiotics (within 3 hours) but consider non-bacterial sources and likely source. Allows clinical teams time to complete rapid assessment<br><br>In patients with high NEWS2 but low PCT (<0.5) explicit advice to consider non-infectious causes of presentation |
| Low        | Low risk of progression to sepsis. consider non-bacterial sources, likely source and whether requires antibiotics                                                                                                                                                                                                                  |

Table 1 Clinical Risk Management Interpretation

## Informed Consent

Research carried out in emergency situations is challenging in terms of obtaining consent. Emergency research is when treatment needs to be given urgently, and it is necessary to take urgent action for the purposes of the study. In some emergency situations people may lack capacity to give consent themselves and obtaining consent from a legal representative or consulting others is not reasonably practicable. In England and Wales, the law allows adults who lack capacity to take part in emergency research without prior consent from a legal representative or consulting others, if certain conditions are met (Medicines for Human Use (Clinical Trials) Amendment (No 2) Regulations SI 2006 2984, Mental Capacity Act s32) [30]. Given the requirement for rapid clinical assessment and treatment in the management of suspected sepsis, for this trial we will use a deferred consent model. Patients and their relatives will be informed that a study is ongoing but a lengthy consent discussion will not be had so as not to delay treatment. Should the patient or consultee wish not to take part at this point, then the decision will be respected and the patient will not be enrolled into the trial. Following randomisation an approach to obtain informed consent will be made as soon as is practicably feasible, ideally within

1  
2  
3 72 hours (Figure 2). Where a participant lacks mental capacity, a maximum of three approaches will be  
4 made. After three approaches, or if the participant is not likely to regain mental capacity, a personal  
5 consultee will be approached. In extreme circumstances, where no personal consultee can be identified,  
6 a nominated consultee will be approached. Separate informed consent will be taken for participation in  
7 the qualitative data collection. Patients who do not consent to continue in the study will be withdrawn  
8 completely from the study. A tiered consent model is used in this study and allows participants to  
9 consent to different aspects of the study. A list of consent levels is in supplementary appendix table 1.  
10  
11  
12  
13  
14  
15  
16  
17  
18  
19

## 20 **Data Collection during primary admission**

21  
22  
23 All data collection will be by electronic data capture using a bespoke database developed by the CTR  
24 and hosted by Cardiff University secure servers. It is encrypted and accessed by individual username  
25 and password. Paper copies of all case report forms (CRFs) will be available. Essential documents will  
26 be kept securely in a locked cupboard, and at the end of the trial, will be archived at an approved external  
27 storage facility for 10 years. A member of the research team in ED will undertake the data collection  
28 relating to the NEWS2 screening, trial intervention and whether clinical teams followed the intervention  
29 or standard of care risk assessment. Participants who consent to continue in the study will have daily  
30 information collected from the date of randomisation until they are discharged from hospital or until  
31 day 28, whichever is sooner. Trial data is collected from patients' health records and no trial visits occur  
32 between consent and day 28. Key follow-up data is listed in supplementary appendix table 2.  
33  
34  
35  
36

## 37 **FOLLOW UP**

### 38 **28 Day Follow Up**

39  
40  
41  
42 Day 28 follow-ups will be conducted via telephone or in person if remains an inpatient. These will  
43 comprise an EQ-5D/5L validated questionnaire for participant or proxy completion, and a Health  
44 Economics questionnaire where patient outcomes (readmission, re-treatment, hospital-acquired  
45 infection) and use of healthcare resource (hospital admissions, outpatient parenteral antimicrobial  
46 therapy, other prescribed medicines, privately purchased over-the-counter medicines, GP and hospital  
47 outpatient attendance) will be captured. In addition, direct non-medical costs borne by patients/carers  
48 as a result of attending hospital (travel costs, childcare costs, expenses incurred while in hospital, self-  
49 reported lost earnings and other direct non-medical expenses) will be collected.  
50  
51  
52

### 53 **90 Day Follow Up**

54  
55  
56 EQ-5D/5L questionnaires will be repeated and a shortened Health Economics questionnaire to capture  
57 any additional costs or hospital admissions since the Day 28 questionnaires will be completed.  
58  
59

## 60 **Withdrawal**

Participants have the right to withdraw from the study at any time and can request that all data collected up to that point is not used.

## Safety and Pharmacovigilance

The trial population comprises unwell hospital inpatients. Events such as prolongation of existing hospitalisation, life threatening events and death are expected in this population and are recorded as part of routine data collection and therefore are not subject to expedited reporting. Serious adverse events will be reported if the event results in persistent or significant disability or incapacity or consists of a congenital anomaly or birth defect. An assessment of causality between the event and the trial intervention will be carried out by the principal investigator or delegated clinician, and then independently by a clinical reviewer. If the clinical reviewer classifies the event as probably or definitely caused by the intervention, it will be classified as a serious adverse reaction. Non-serious AEs potentially attributable to PCT test will be collected as part of routine follow up at 28 days. Any other non-serious AEs will not be collected.

## Data Management

Details of data management procedures (such as checking for missing, illegible or unusual value (range checks) will be specified in the PRONTO Data Management Plan. Details of Monitoring procedures will be specified in the PRONTO Monitoring plan.

## STATISTICAL ANALYSIS

### Outcome Measures

The co-primary outcomes of this study are the initiation of IV antibiotics at three hours (intervention arm to be shown superior to control) and 28-day mortality (intervention arm to be shown non-inferior to control). Co-primary and secondary outcomes are listed in Table 2. Final decisions about the primary effectiveness of the intervention, using these co-primary outcomes will be made based on the decision matrix (Table 3). All outcomes will be stratified by COVID-19 diagnosis (SARS-CoV2 PCR positive or high likelihood of clinical COVID-19 as determined by a senior clinician).

Table 2: Co-primary and secondary outcomes.

|                                                                                                                                                                                                                                                                                                                                                                                                                                                                                                                                                                                                                                     |
|-------------------------------------------------------------------------------------------------------------------------------------------------------------------------------------------------------------------------------------------------------------------------------------------------------------------------------------------------------------------------------------------------------------------------------------------------------------------------------------------------------------------------------------------------------------------------------------------------------------------------------------|
| Co-primary outcome measures:                                                                                                                                                                                                                                                                                                                                                                                                                                                                                                                                                                                                        |
| <ul style="list-style-type: none"> <li>Intravenous antimicrobial initiation – binary outcome assessed at 3 hours.</li> <li>28-day mortality – binary outcome.</li> </ul>                                                                                                                                                                                                                                                                                                                                                                                                                                                            |
| Secondary outcome measures:                                                                                                                                                                                                                                                                                                                                                                                                                                                                                                                                                                                                         |
| <ul style="list-style-type: none"> <li>Time until initiation of IV antibiotic therapy.</li> <li>Late IV antibiotic initiation – antibiotics commenced after 3 hours.</li> <li>Number of days on IV antibiotics (during admission and total over the first 28 days).</li> <li>Number of days on any antibiotic (during admission and total over the first 28 days).</li> <li>Number of days on broad spectrum antibiotics (IV and oral), defined by number of days on an Access group of antibiotics as defined by WHO <a href="#">AWaRe Classification Database</a> (during admission and total over the first 28 days).</li> </ul> |

- ICU admission – at any point during admission.
- Length of ICU stay.
- Length of hospital stay.
- Adverse antibiotic outcomes.
- Readmission to hospital within 90 days.
- Mortality within 90 days (and time until death).
- Health utility (EQ-5D/5L) at 28 and 90 days.
- Health resource usage.
- Feasibility of implementing PCT testing alongside NEWS2 scoring in EDs .
- Acceptability of implementing PCT testing alongside NEWS2 scoring in EDs, to patients, carers and clinicians.
- Total average cost per patient per arm and cost per gained (health-adjusted) life year.

Table 3: Decision matrix for co-primary outcomes

|                      | Reduced antibiotic initiation | Same or more antibiotic initiation |
|----------------------|-------------------------------|------------------------------------|
| Decreased mortality  | Effective                     | Effective                          |
| Equivalent mortality | Effective                     | Not effective                      |
| Increased mortality  | Not effective / harmful       | Not effective / harmful            |

## Sample Size

The sample size calculation is based on two co-primary outcomes [31] :

1. 28-day mortality, for which we want to show non-inferiority of the PCT guided assessment as compared to current standard practice, using an absolute 2.5% non-inferiority margin. Assuming a 28-day mortality of 15% in patients managed as suspected sepsis treated in the ED [3 32], this means that any increase in 28-day mortality from 15% to not more than 17.5% would be considered non-inferior. For 90% power and one-sided 5% significance level the sample size required is 7002, assuming there is no difference in 28-day mortality between arms. Our patient focus group were also consulted on the 2.5% non-inferiority margin and felt that this was acceptable if there were mechanisms to monitor trial outcomes, and if this was what was needed to provide a sample size which would ensure the trial could be completed as well as answer the research question.
2. Initiation of antibiotics treatment, for which we want to show superiority. Currently around 90% of patients managed as suspected sepsis receive antibiotics (Liverpool University Hospitals NHS Foundation Trust, unpublished data). A reduction to 80% would be considered a success. To detect such an effect with 90% power and two-sided 5% significance level the sample size required is 532, which is substantially lower than what is needed for the non-inferiority endpoint. With 7002 patients we would be able to detect effects as small as a reduction from 90% to 87.6%, with 90% power.

Accounting for 5% dropout, we would need a total sample size of 7372. The group-sequential design with O'Brien-Fleming stopping boundaries for both effectiveness and futility/safety will increase the

total maximum sample size (if the study is not stopped after the interim analysis) by just over 4% to 7676 (inflated for 5% dropout).

These sample sizes were calculated using SAS 9.4 PROC POWER and PROC SEQDESIGN.

### Interim analysis

A planned interim analysis of the co-primary outcomes will be conducted when 50% of patients have been recruited and followed up for 28 days. Stopping the study shall be recommended by the Independent Data Monitoring Committee (IDMC) based on group-sequential O'Brien-Fleming boundaries. They shall recommend stopping for effectiveness if:

- the PCT guided assessment is superior in terms of 28-day mortality (i.e. a significant reduction to less than 15%), or
- the PCT guided assessment is non-inferior in terms of 28-day mortality and superior in terms of initiation of antibiotics.

They shall recommend stopping for futility if the results of the interim analysis suggest futility for both endpoints. This strategy ensures overall type I error rate control [33 34]. The exact stopping rules will be specified in an interim analysis plan.

### Final analysis

The primary analysis will be intention-to-treat and will fit separate two-level logistic regression models (patients nested within sites) to both co-primary outcomes (antibiotic initiation and mortality), controlling for baseline NEWS2 score (minimisation factor). The intervention will be considered effective if there is both a significant reduction in antibiotic initiation (two-sided 5% level) and if the difference in mortality between the two groups is non-inferior (one-sided 5% level). In case the 28-day mortality rate in the control arm deviates from the assumed 15%, the absolute 2.5% non-inferiority margin will be replaced with an arcsine difference 'non-inferiority frontier' [35]. The primary analysis will be adjusted to account for the group-sequential design. Imputation of missing data will be done as part of sensitivity analyses.

In a secondary analysis, complier adjusted causal effect models will be fitted to allow for non-adherence to the intervention. Two models will be fitted allowing for two different definitions of adherence:

1. Patients randomised to PCT guided care in whom a PCT test is done and the clinician considers the results as part of their decision making.
2. Patients randomised to PCT guided care in whom a PCT test is done and the clinician follows the algorithm exactly.

Analyses of secondary outcomes will also be performed as intention-to-treat and utilising appropriate two-level regression models depending on the type of outcome (e.g. linear regression for continuous outcomes, Cox regression for time-to-event outcomes) to allow for patients nested within sites. This includes an HTA and economic evaluation as per CHEERS 2022 guidance. Analyses will be split by organ system of the infection (e.g. lower urinary tract, lower respiratory, intra-abdominal, bacteraemia, skin and soft tissue etc). Stratified analyses will be undertaken at different levels of NEWS2 scoring  $\leq$

1  
2  
3  
4 4, 5-6 and  $\geq 7$ , and will also be undertaken by COVID status. All further details will be specified in a  
5 statistical analysis plan which will be finalised prior to database lock.  
6  
7

8  
9 Missing primary outcome data is likely to be minimal, so complete case analysis will be used. However,  
10 if this exceeds more than 20% of participants we will employ multiple imputation and report the impact  
11 on the treatment effect alongside the complete case analysis. Further detail is provided in the PRONTO  
12 Statistical Analysis Plan (SAP).  
13  
14  
15

## 16 **QUALITATIVE STUDY**

17  
18  
19 The qualitative work will have three components: interviews with clinicians, interviews with  
20 patients/carers, and observations of trial implementation (when appropriate during the ongoing current  
21 COVID-19 pandemic). Findings will be used to aid understanding of the quantitative data and provide  
22 areas for improvement in processes to enhance the efficiency of the trial.  
23  
24  
25

26 Interviews with clinicians will take place at two time points. Interview 1 will take place during the pilot  
27 phase and will be a semi-structured interview with 10-12 clinicians at  $<5$  study sites (2-3 per site). This  
28 will explore the feasibility and acceptability of research processes and integration of the PCT algorithm  
29 into their ED setting. Interview 2 will be with clinicians towards the end of the trial when they have  
30 more experience of using the PCT algorithm and will identify barriers and facilitators to the use  
31 of the PCT test and algorithm in more detail, including reasons for deviating from the study algorithm.  
32  
33

34 We will conduct semi-structured interviews with patients after the 90 day follow-up, in order to gain a  
35 detailed understanding of patients' experiences of care to aid understanding of trial results. We will  
36 encourage patients to include a close family member in the interview also. This will allow us to capture  
37 an additional perspective on the patients' care.  
38  
39

## 40 **PATIENT AND PUBLIC INVOLVEMENT**

41  
42  
43 The proposal has benefited from multiple interactions with PPI groups to refine the research question  
44 and design. Author JC is a lay co-applicant/patient representative, who has co-produced and helped  
45 finalise the study design. As a co-applicant JC is a member of the Trial Management Group ensuring  
46 that all patient facing materials are presented in a suitable way. Her experience is invaluable throughout  
47 the project, including the promotion of the trial to potential participants and appropriate dissemination  
48 of findings to the lay public.  
49  
50

51 In addition, we have convened wider PPI advisory panels from both higher education institutions and  
52 NHS patient groups. We discussed the trial with the panel at the Royal Liverpool Hospital in August  
53 2018, focusing on need, conception, design and trial management. The group fully supported the need  
54 for this trial recognising the potential for PCT measurement to improve outcomes for patients with  
55 suspected sepsis and supported the use of deferred consent. Specific feedback about these aspects has  
56 now been used to update the relevant parts of the proposal.  
57  
58  
59  
60

## TRIAL MANAGEMENT

The trial is sponsored by the University of Liverpool and coordinated by Cardiff University CTR.

### Trial Management Group

The Trial Management Group (TMG) will meet monthly throughout the course of the trial and will include the Co-chief Investigators, co-applicants, collaborators, trial manager, data manager and administrator. TMG members will be required to sign up to the remit and conditions as set out in the TMG Charter.

### Trial Steering Committee and Independent Data Monitoring Committee

An independent Trial Steering Committee (TSC) consisting of an independent chairperson, two independent members and a patient representative will provide oversight of the PRONTO trial. There will also be a separate Independent Data Monitoring Committee (IDMC) to provide oversight of all matters relating to patient safety and data quality, and recommend continuing or stopping the trial depending on the results of the interim analysis. Members will be required to sign up to the remit and conditions as set out in the TSC and IDMC charters and will meet at least annually.

## ETHICS AND DISSEMINATION

### Research approvals

The trial was approved by the NHS Research Ethics Committee (Wales REC 2 reference 20/WA/0058) on the 21st July 2020 and subsequent HRA and Health and Care Research Wales approval was granted on 22<sup>nd</sup> July 2020. The following substantial amendments were made to the trial and were communicated to all trial sites: Amendment 5 (23<sup>rd</sup> October 2020); Amendment 7 (10<sup>th</sup> December 2020); Amendment 9 (25<sup>th</sup> February 2021); Amendment 12 (29<sup>th</sup> June 2021), Amendment 15 (15<sup>th</sup> October 2021), 1 Amendment 17 (6<sup>th</sup> January 2022).

The study has the following registration: **ISRCTN54006056**

### Dissemination plan

We will engage with patient groups and the wider public through relevant charities such as UK Sepsis Trust and Antibiotics Action, and seek to present trial updates at their annual conferences. We will use press releases and social media outlets to publicise the trial and disseminate findings. A 90 second animation outlining the PRONTO main aims was commissioned <https://www.youtube.com/watch?v=H3x-rNVlwJI> [36] and accessed via posters and patient information leaflets via a scannable QR code. At the end of the trial, a final report will be prepared for the National Institute of Health Research Health Technology Assessment (NIHR HTA) Journal series. The results will be disseminated locally, nationally and internationally amongst scientific, clinical and lay groups including participants and their families. All publications and presentations related to the

1  
2  
3 trial will be authorised by the TMG in accordance with the PRONTO publication policy. Where  
4 appropriate, the results of this trial can be directly implemented in the revisions of the NICE guidelines.  
5  
6

### 7 **Acknowledgements:**

8  
9 In addition to the authors, the PRONTO team comprises Sam Clarkstone, Jacqui Hughes and Lena  
10 Meister. The authors would like to pay special thanks to Principal Investigators Dr Andrew Tabner  
11 (Royal Derby Hospital) and Dr Gavin Barlow (Hull Royal Infirmary) for their input and constructive  
12 feedback at PRONTO TMG meetings. The authors would like to thank the research nurses and  
13 clinicians for their support during the trial. They would also like to acknowledge the contribution of the  
14 TSC members, namely Professor Timothy Peto, Professor Richard Body, Mike Bradburn, Professor  
15 Jane Daniels, Emma Richards and Angela Brain. The authors would also like to acknowledge the  
16 contribution of the IDMC members, namely Professor Sarah Walker, Professor Steve Goodacre, Dr  
17 Matthew Scarborough, Sian O'Shea and Claire James.  
18  
19  
20

### 21 **Author Contributions**

22  
23 NF and ST are co-Chief-Investigators of this trial. NF and ST, along with ET-J, EDC, LB-H, PH, MI-  
24 K, MJL, FM, LN, EN, PP, PS, DT-R, IW and KH led the development of the research question, study  
25 design, obtaining the funding and implementation of the protocol. JE is the Trial Manager and ET-J is  
26 the senior trial manager who coordinate the operational delivery of the trial protocol and recruitment.  
27 LB-H is the lead qualitative researcher. PP is the trial statistician. SG is the data manager. All authors  
28 listed provided critical review and final approval of the manuscript.  
29  
30  
31

### 32 **Funding**

33  
34 This trial is funded by the National Institute of Health Research Health Technology Assessment (NIHR  
35 HTA) programme, funder reference 17/136/13. The Centre for Trials Research at Cardiff University  
36 receives infrastructure funding from Health and Care Research Wales. The study is supported by the  
37 NIHR Clinical Research Network.  
38  
39  
40

### 41 **Sponsor**

42  
43 PRONTO is sponsored by University of Liverpool. Sponsor@Liverpool.ac.uk, Sponsor reference:  
44 UoL001520.  
45  
46

### 47 **Competing Interests Statement**

48  
49 EDC is co-CI for the BATCH Trial (HTA 15/188/42) and the PEACH study (HTA Project:  
50 NIHR132254) on PCT use, and member of NICE Diagnostic advisory committee (2014–2020), and  
51 NICE Sepsis guideline development committee (2014–6). All other authors declare no competing  
52 interests.  
53  
54

### 55 **Disclaimer**

56  
57 The views expressed are those of the authors and not necessarily those of the NHS, the NIHR or the  
58 Department of Health and Social Care. Neither the Sponsor nor the Funder had any role in the study  
59  
60



1  
2  
3 design; collection, management, analysis and interpretation of data; writing of this manuscript or in the  
4 decision to submit this manuscript for publication. ThermoFisher are not funding the study, and have  
5 no influence on the design, conduct or reporting of the study  
6  
7

### 8 **Consent for publication**

9

10 Not Applicable  
11  
12

### 13 **Availability of data and material**

14 Not Applicable at the time of publication. Data available on request following publication of trial  
15 results.  
16  
17  
18  
19  
20  
21  
22  
23  
24  
25  
26  
27  
28

## 29 **REFERENCES**

- 30  
31  
32 1. Singer M, Deutschman CS, Seymour CW, et al. The Third International Consensus Definitions for  
33 Sepsis and Septic Shock (Sepsis-3). *JAMA* 2016;**315**(8):801-10 doi:  
34 10.1001/jama.2016.0287[published Online First: Epub Date].  
35  
36 2. NICE Sepsis Guide Development Group. Sepsis: recognition, diagnosis and early management ,  
37 NICE guideline [NG51]. Last Update. [www.nice.org.uk/guidance/ng51](http://www.nice.org.uk/guidance/ng51).  
38  
39 3. Corfield AR, Lees F, Zealley I, et al. Utility of a single early warning score in patients with sepsis  
40 in the emergency department. *Emerg Med J* 2014;**31**(6):482-7 doi: 10.1136/emermed-2012-  
41 202186[published Online First: Epub Date].  
42  
43 4. Burston J, Adhikari S, Hayen A, et al. A Role for Antimicrobial Stewardship in Clinical Sepsis  
44 Pathways: a Prospective Interventional Study. *Infect Control Hosp Epidemiol*  
45 2017;**38**(9):1032-38 doi: 10.1017/ice.2017.139[published Online First: Epub Date].  
46  
47 5. Singer M, Inada-Kim M, Shankar-Hari M. Sepsis hysteria: excess hype and unrealistic  
48 expectations. *Lancet* 2019;**394**(10208):1513-14 doi: 10.1016/S0140-6736(19)32483-  
49 3[published Online First: Epub Date].  
50  
51 6. Klein Klouwenberg PM, Cremer OL, van Vught LA, et al. Likelihood of infection in patients with  
52 presumed sepsis at the time of intensive care unit admission: a cohort study. *Crit Care*  
53 2015;**19**:319 doi: 10.1186/s13054-015-1035-1[published Online First: Epub Date].  
54  
55 7. O'Neill J. Tackling drug-resistant infections globally: final report and recommendations. The  
56 review on antimicrobial resistance. London, 2016.  
57  
58  
59  
60

- 1  
2  
3  
4 8. Goodacre S, Thomas B, Lee E, et al. Characterisation of 22445 patients attending UK emergency  
5 departments with suspected COVID-19 infection: Observational cohort study. PLoS One  
6 2020;**15**(11):e0240206 doi: 10.1371/journal.pone.0240206[published Online First: Epub  
7 Date]].
- 8  
9 9. Schuetz P, Wirz Y, Sager R, et al. Effect of procalcitonin-guided antibiotic treatment on mortality  
10 in acute respiratory infections: a patient level meta-analysis. Lancet Infect Dis 2018;**18**(1):95-  
11 107 doi: 10.1016/S1473-3099(17)30592-3[published Online First: Epub Date]].
- 12  
13 10. Ou M, Zhu J, Ji P, et al. Risk factors of severe cases with COVID-19: a meta-analysis. Epidemiol  
14 Infect 2020;**148**:e175 doi: 10.1017/S095026882000179X[published Online First: Epub  
15 Date]].
- 16  
17 11. Tjendra Y, Al Mana AF, Espejo AP, et al. Predicting Disease Severity and Outcome in COVID-19  
18 Patients: A Review of Multiple Biomarkers. Arch Pathol Lab Med 2020;**144**(12):1465-74 doi:  
19 10.5858/arpa.2020-0471-SA[published Online First: Epub Date]].
- 20  
21 12. Physicians RCo. National Early Warning Score (NEWS) 2. Last Update December 2017.  
22 <https://www.rcplondon.ac.uk/projects/outputs/national-early-warning-score-news-2>.
- 23  
24 13. Graham CA, Hung KKC, Leung LY, Lo RSL. QSOFA, SIRS and NEWS2 to Predict 60-Day  
25 Mortality in the Emergency Department: Prospective Study. American Journal of Respiratory  
26 and Critical Care Medicine 2019
- 27  
28 14. Mellhammar L, Linder A, Tverring J, et al. NEWS2 is Superior to qSOFA in Detecting Sepsis  
29 with Organ Dysfunction in the Emergency Department. J Clin Med 2019;**8**(8) doi:  
30 10.3390/jcm8081128[published Online First: Epub Date]].
- 31  
32 15. Churpek MM, Snyder A, Han X, et al. Quick Sepsis-related Organ Failure Assessment, Systemic  
33 Inflammatory Response Syndrome, and Early Warning Scores for Detecting Clinical  
34 Deterioration in Infected Patients outside the Intensive Care Unit. Am J Respir Crit Care Med  
35 2017;**195**(7):906-11 doi: 10.1164/rccm.201604-0854OC[published Online First: Epub Date]].
- 36  
37 16. Redfern OC, Smith GB, Prytherch DR, Meredith P, Inada-Kim M, Schmidt PE. A Comparison of  
38 the Quick Sequential (Sepsis-Related) Organ Failure Assessment Score and the National  
39 Early Warning Score in Non-ICU Patients With/Without Infection. Crit Care Med  
40 2018;**46**(12):1923-33 doi: 10.1097/CCM.0000000000003359[published Online First: Epub  
41 Date]].
- 42  
43 17. Evans L, Rhodes A, Alhazzani W, et al. Surviving Sepsis Campaign: International Guidelines for  
44 Management of Sepsis and Septic Shock 2021. Critical Care Medicine 2021;**49**(11)
- 45  
46 18. Myrstad M, Ihle-Hansen H, Tveita AA, et al. National Early Warning Score 2 (NEWS2) on  
47 admission predicts severe disease and in-hospital mortality from Covid-19 - a prospective  
48 cohort study. Scand J Trauma Resusc Emerg Med 2020;**28**(1):66 doi: 10.1186/s13049-020-  
49 00764-3[published Online First: Epub Date]].
- 50  
51  
52  
53  
54  
55  
56  
57  
58  
59  
60

19. Sze S, Pan D, Williams CML, et al. Letter to the Editor: Variability but not admission or trends in NEWS2 score predicts clinical outcome in elderly hospitalised patients with COVID-19. *J Infect* 2021;**82**(1):159-98 doi: 10.1016/j.jinf.2020.05.063[published Online First: Epub Date].
20. Langford BJ, So M, Raybardhan S, et al. Bacterial co-infection and secondary infection in patients with COVID-19: a living rapid review and meta-analysis. *Clin Microbiol Infect* 2020;**26**(12):1622-29 doi: 10.1016/j.cmi.2020.07.016[published Online First: Epub Date].
21. Docherty AB, Harrison EM, Green CA, et al. Features of 20 133 UK patients in hospital with covid-19 using the ISARIC WHO Clinical Characterisation Protocol: prospective observational cohort study. *BMJ* 2020;**369**:m1985 doi: 10.1136/bmj.m1985[published Online First: Epub Date].
22. NICE. Procalcitonin testing for diagnosing and monitoring sepsis (ADVIA Centaur BRAHMS PCT assay, BRAHMS PCT Sensitive Kryptor assay, Elecsys BRAHMS PCT assay, LIAISON BRAHMS PCT assay and VIDAS BRAHMS PCT assay): Diagnostic Guidance [DG18]. 2015
23. Westwood M, Ramaekers B, Whiting P, et al. Procalcitonin testing to guide antibiotic therapy for the treatment of sepsis in intensive care settings and for suspected bacterial infection in emergency department settings: a systematic review and cost-effectiveness analysis. *Health Technol Assess* 2015;**19**(96):v-xxv, 1-236 doi: 10.3310/hta19960[published Online First: Epub Date].
24. Richards O, Pallmann P, King C, et al. Procalcitonin Increase Is Associated with the Development of Critical Care-Acquired Infections in COVID-19 ARDS. *Antibiotics (Basel)* 2021;**10**(11) doi: 10.3390/antibiotics10111425[published Online First: Epub Date].
25. Heesom L, Rehnberg L, Nasim-Mohi M, et al. Procalcitonin as an antibiotic stewardship tool in COVID-19 patients in the intensive care unit. *J Glob Antimicrob Resist* 2020;**22**:782-84 doi: 10.1016/j.jgar.2020.07.017[published Online First: Epub Date].
26. Llewelyn MJ, Grozeva D, Howard P, et al. Impact of introducing procalcitonin testing on antibiotic usage in acute NHS hospitals during the first wave of COVID-19 in the UK: a controlled interrupted time series analysis of organization-level data. *J Antimicrob Chemother* 2022 doi: 10.1093/jac/dkac017[published Online First: Epub Date].
27. Kamat IS, Ramachandran V, Eswaran H, Guffey D, Musher DM. Procalcitonin to Distinguish Viral From Bacterial Pneumonia: A Systematic Review and Meta-analysis. *Clinical Infectious Diseases* 2019;**70**(3):538-42 doi: 10.1093/cid/ciz545[published Online First: Epub Date].
28. Altman DG, Bland JM. Treatment allocation by minimisation. *BMJ* 2005;**330**(7495):843 doi: 10.1136/bmj.330.7495.843[published Online First: Epub Date].
29. NIHR. Sepsis: Quality standard [QS161]. Last Update. <https://www.nice.org.uk/guidance/qs161>.
30. Medicines For Human Use (Clinical Trials) Amendment Regulations (SI 2006/1928), 2006.

- 1  
2  
3  
4 31. Gillespie D, Francis NA, Carrol ED, Thomas-Jones E, Butler CC, Hood K. Use of co-primary  
5 outcomes for trials of antimicrobial stewardship interventions. *Lancet Infect Dis*  
6 2018;**18**(6):595-97 doi: 10.1016/S1473-3099(18)30289-5[published Online First: Epub  
7 Date]].  
8  
9 32. Goulden R, Hoyle MC, Monis J, et al. qSOFA, SIRS and NEWS for predicting in-hospital  
10 mortality and ICU admission in emergency admissions treated as sepsis. *Emerg Med J*  
11 2018;**35**(6):345-49 doi: 10.1136/emmermed-2017-207120[published Online First: Epub Date]].  
12  
13 33. Hamasaki T, Asakura K, Evans SR, Sugimoto T, Sozu T. Group-Sequential Strategies in Clinical  
14 Trials with Multiple Co-Primary Outcomes. *Stat Biopharm Res* 2015;**7**(1):36-54 doi:  
15 10.1080/19466315.2014.1003090[published Online First: Epub Date]].  
16  
17 34. Flight L, Julious SA. Practical guide to sample size calculations: non-inferiority and equivalence  
18 trials. *Pharm Stat* 2016;**15**(1):80-9 doi: 10.1002/pst.1716[published Online First: Epub Date]].  
19  
20 35. Quartagno M, Walker AS, Babiker AG, et al. Handling an uncertain control group event risk in  
21 non-inferiority trials: non-inferiority frontiers and the power-stabilising transformation. *Trials*  
22 2020;**21**(1):145 doi: 10.1186/s13063-020-4070-4[published Online First: Epub Date]].  
23  
24 36. Animated S. Optimising antibiotic use in sepsis: PRONTO Trial. Last Update.  
25  
26 <https://www.youtube.com/watch?v=H3x-rNVlwJI>.  
27  
28  
29  
30  
31  
32

## 33 **Figure Legends**

34 Figure 1 Trial Schema

35 Figure 2 Informed Consent Flow Chart

1  
2  
3  
4  
5  
6  
7  
8  
9  
10  
11  
12  
13  
14  
15  
16  
17  
18  
19  
20  
21  
22  
23  
24  
25  
26  
27  
28  
29  
30  
31  
32  
33  
34  
35  
36  
37  
38  
39  
40  
41  
42  
43  
44  
45  
46  
47  
48  
49  
50  
51  
52  
53  
54  
55  
56  
57  
58  
59  
60

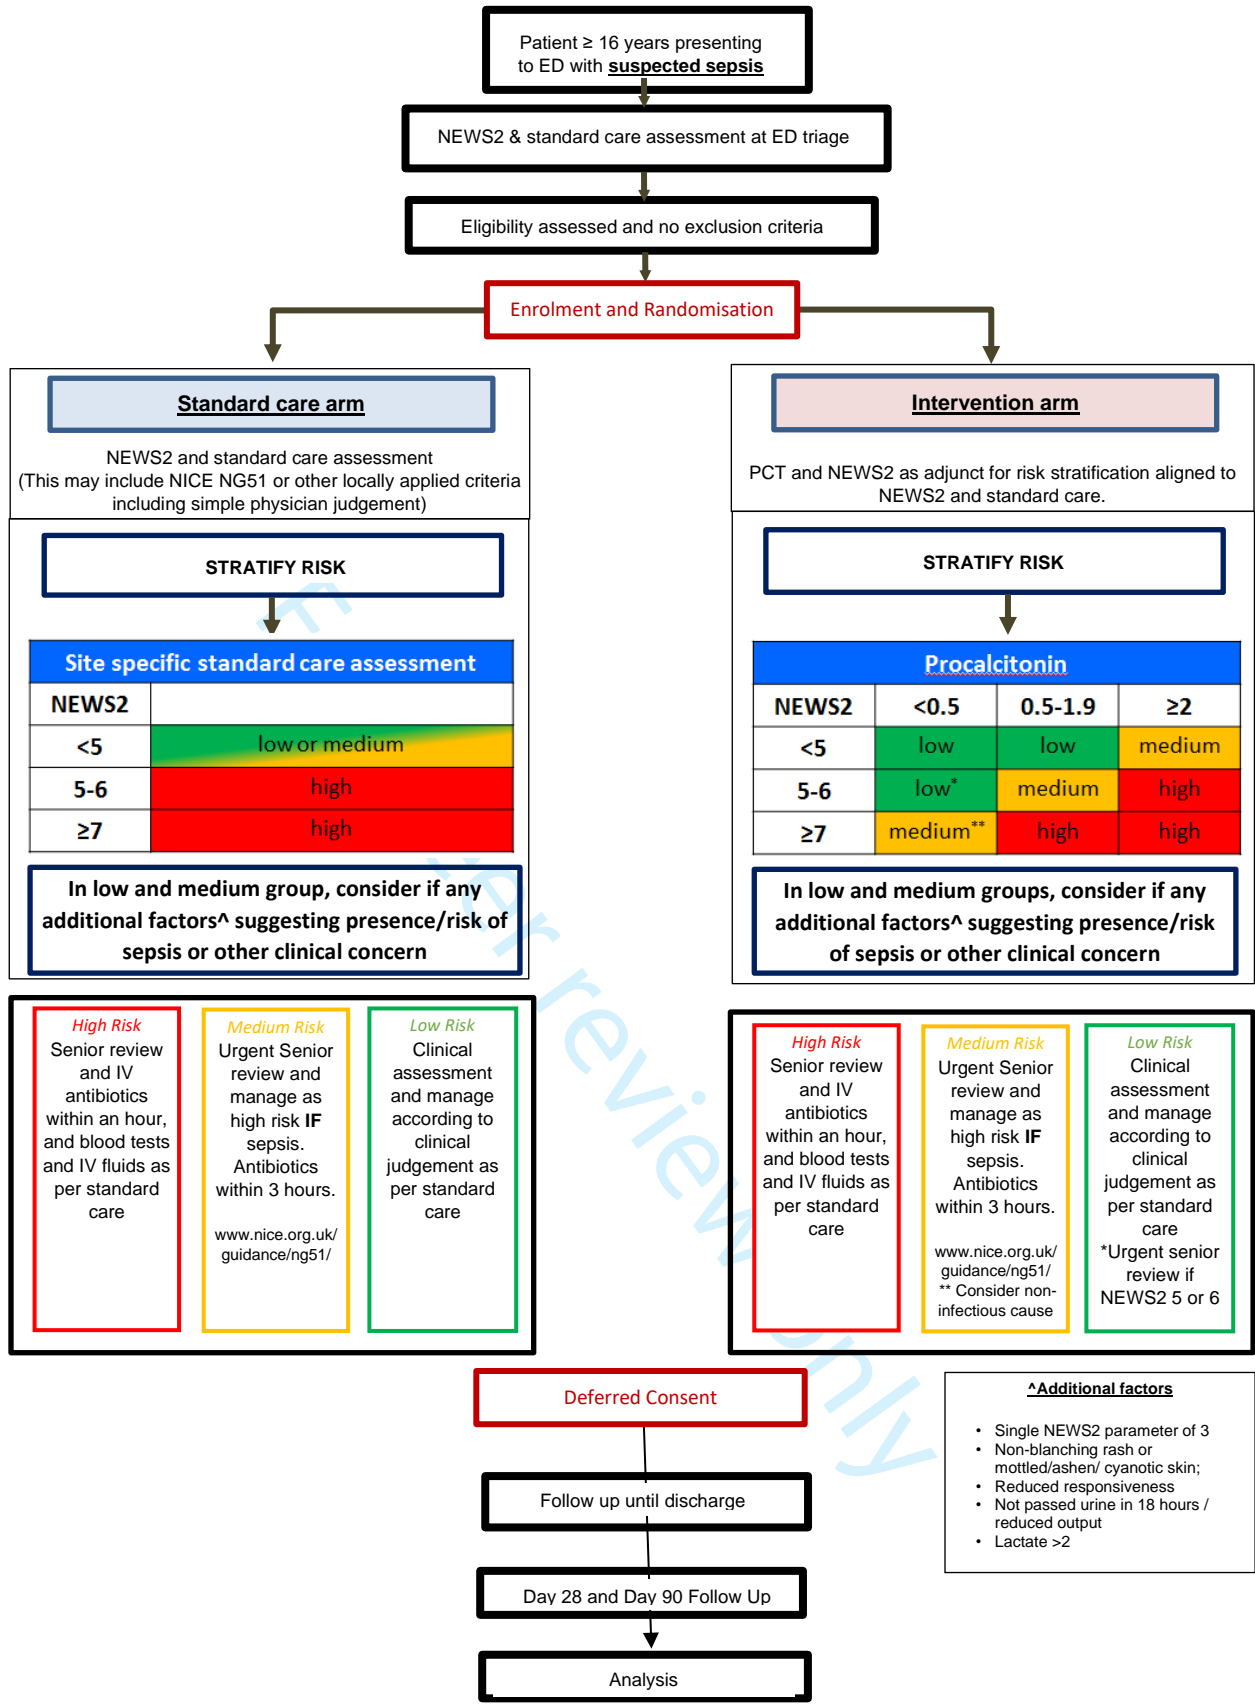

- ^Additional factors**
- Single NEWS2 parameter of 3
  - Non-blanching rash or mottled/ashen/ cyanotic skin;
  - Reduced responsiveness
  - Not passed urine in 18 hours / reduced output
  - Lactate >2

1  
2  
3  
4  
5  
6  
7  
8  
9  
10  
11  
12  
13  
14  
15  
16  
17  
18  
19  
20  
21  
22  
23  
24  
25  
26  
27  
28  
29  
30  
31  
32  
33  
34  
35  
36  
37  
38  
39  
40  
41  
42  
43  
44  
45  
46

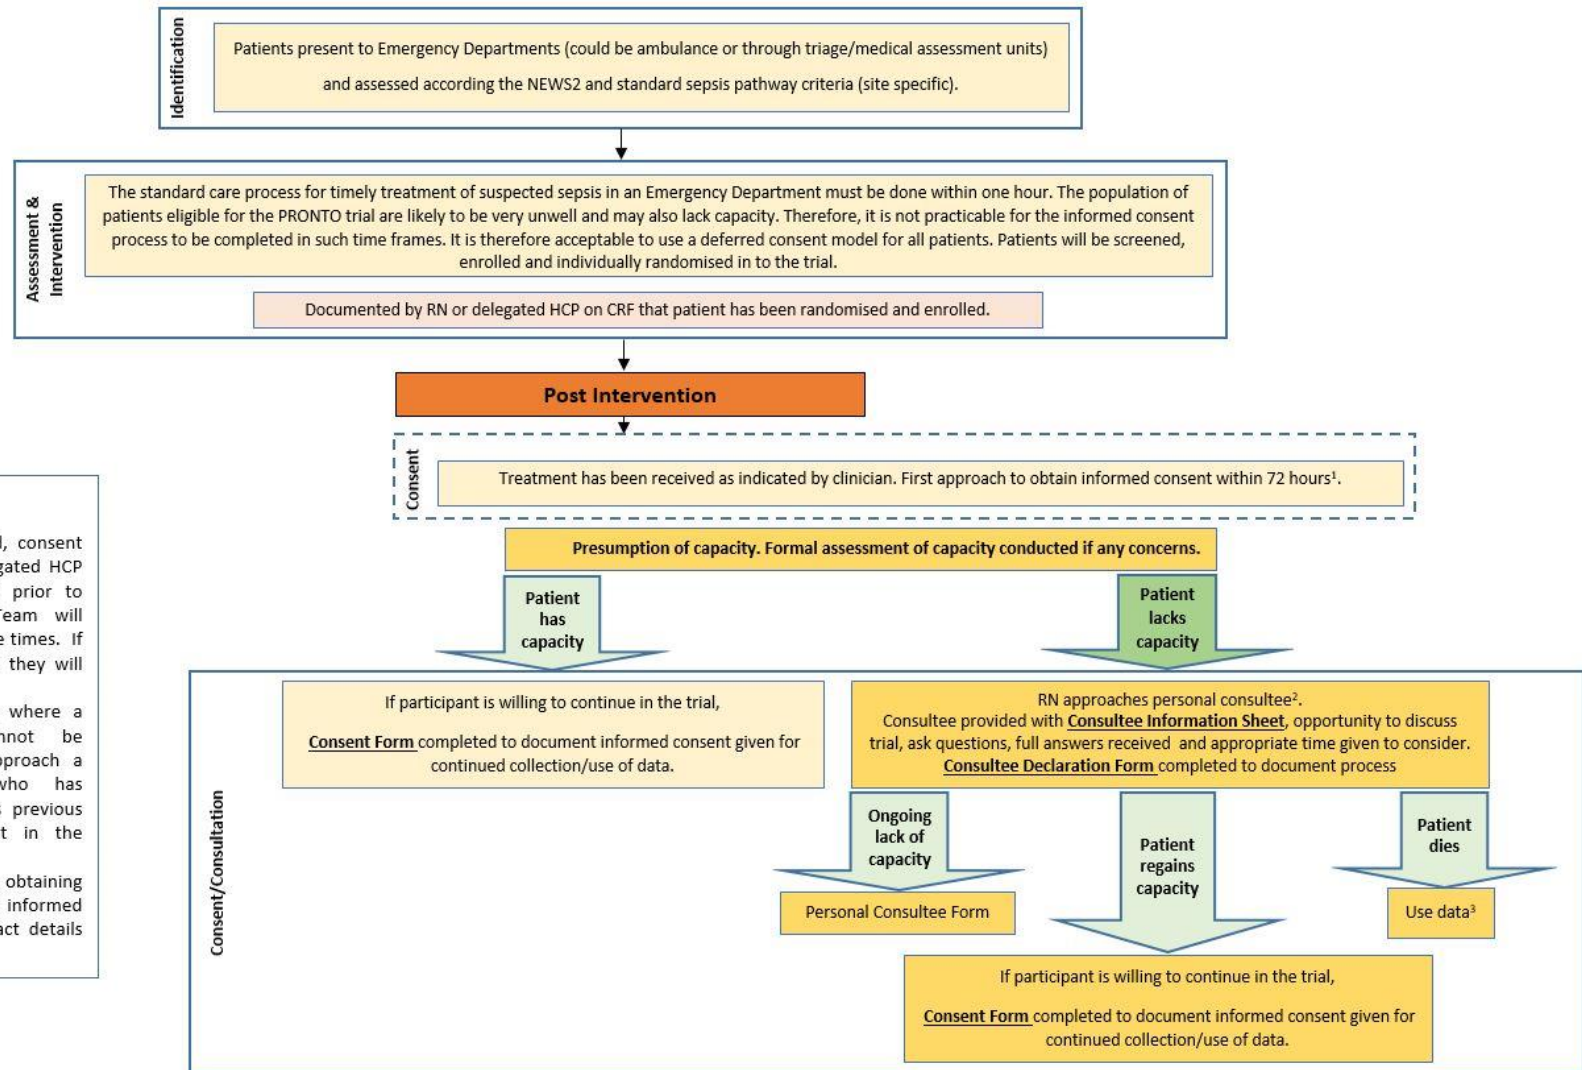

**Footnotes**

1. If participant is discharged, consent obtained as detailed. Delegated HCP to try to obtain consent prior to discharge or Research Team will attempt contact up to three times. If patient is not contactable, they will be removed from study.
2. In extreme circumstances where a personal consultee cannot be identified, ED staff to approach a nominated consultee who has knowledge of participant's previous care but no involvement in the PRONTO trial.
3. If a participant dies prior to obtaining consent, the family will be informed via letter with study contact details and further information.

**Supplementary table 1 – Tiered Consent Levels**

|   |                                                                                                                                                                               |
|---|-------------------------------------------------------------------------------------------------------------------------------------------------------------------------------|
| 1 | Information collected as part of the trial and data from medical records up to this point can be used in the trial                                                            |
| 2 | Data from records can be collected for the 90 days of the study                                                                                                               |
| 3 | Participant or their consultee agree to be contacted at day 28 and day 90 to ask about health, wellbeing and any further medical treatment the participant may have received  |
| 4 | Information collected as part of this trial can be used in other future studies which have been approved by appropriate NHS procedures (data linkage)                         |
| 5 | Participant or their consultee agree to be invited to an interview about my health experiences, my views on treatment, and what it was like to take part in the PRONTO trial. |

For peer review only

**Supplementary Table 2: Outcome data collection**

| Outcome                                            | Data Source                                                   | Type of data                                    | Frequency         | By Whom                                                                     |
|----------------------------------------------------|---------------------------------------------------------------|-------------------------------------------------|-------------------|-----------------------------------------------------------------------------|
| Antibiotic (Abx) initiation                        | Observation (Obs) charts/medical notes/drug charts            | Time of initiation, Abx type, dose, duration    | Admission/Daily   | Research Nurse                                                              |
| Abx use (IV and Oral) in-patient                   | Obs charts/medical notes/drug charts                          | Abx type, dose, duration                        | Daily             | Research Nurse                                                              |
| Abx use (IV and Oral) post discharge up to 28 days | Obs charts/medical notes/drug charts/patient report/GP record | Abx type, dose, duration                        | At 28 day         | Research Nurse                                                              |
| Adverse events                                     | Obs charts/medical notes                                      | Date, type                                      | Daily             | Research Nurse                                                              |
| ICU usage                                          | Medical notes                                                 | Date, details of admission to ICU               | Daily             | Research Nurse                                                              |
| Unscheduled readmissions                           | Medical notes                                                 | ICU re-admissions, re-admissions post discharge | Daily             | Research Nurse                                                              |
| Mortality                                          | Medical notes                                                 | Date, Description                               | If before Day 28  | Research Nurse                                                              |
| Discharge                                          | Medical notes                                                 | Date, Description                               | If before Day 28  | Research Nurse                                                              |
| Serious Adverse Drug Reactions (ADRs)              | Medical notes                                                 | ADR(s)                                          | Daily             | Research Nurse                                                              |
| Health utility                                     | Patient reported                                              | -                                               | Day 28 and Day 90 | EQ-5D/5L, Patient reported questionnaire, collected by telephone or by post |
| Health-related Quality of Life (EQ-5D/5L)          | Patient reported                                              | -                                               | Day 28 and Day 90 | Patient reported, collected by telephone, or by post                        |
| Resource use                                       | Patient reported                                              | Direct medical costs and resource use           | Day 28 and Day 90 | Patient reported, collected by telephone, or by post                        |



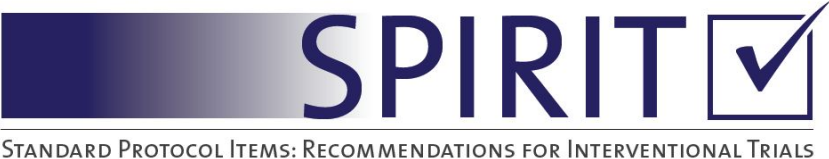

1  
2  
3  
4  
5  
6  
7  
8  
9  
10  
11  
12  
13  
14  
15  
16  
17  
18  
19  
20  
21  
22  
23  
24  
25  
26  
27  
28  
29  
30  
31  
32  
33  
34  
35  
36  
37  
38  
39  
40  
41  
42  
43  
44  
45  
46

SPIRIT 2013 Checklist: Recommended items to address in a clinical trial protocol and related documents\*

| Section/item                      | Item No | Description                                                                                                                                                                                                                                                                              | Addressed on page number |
|-----------------------------------|---------|------------------------------------------------------------------------------------------------------------------------------------------------------------------------------------------------------------------------------------------------------------------------------------------|--------------------------|
| <b>Administrative information</b> |         |                                                                                                                                                                                                                                                                                          |                          |
| Title                             | 1       | Descriptive title identifying the study design, population, interventions, and, if applicable, trial acronym                                                                                                                                                                             | ___ 1 ___                |
| Trial registration                | 2a      | Trial identifier and registry name. If not yet registered, name of intended registry                                                                                                                                                                                                     | ___ 2 ___                |
|                                   | 2b      | All items from the World Health Organization Trial Registration Data Set                                                                                                                                                                                                                 | ___ n/a ___              |
| Protocol version                  | 3       | Date and version identifier                                                                                                                                                                                                                                                              | ___ 2 ___                |
| Funding                           | 4       | Sources and types of financial, material, and other support                                                                                                                                                                                                                              | ___ 13 ___               |
| Roles and responsibilities        | 5a      | Names, affiliations, and roles of protocol contributors                                                                                                                                                                                                                                  | ___ 13 ___               |
|                                   | 5b      | Name and contact information for the trial sponsor                                                                                                                                                                                                                                       | ___ 13 ___               |
|                                   | 5c      | Role of study sponsor and funders, if any, in study design; collection, management, analysis, and interpretation of data; writing of the report; and the decision to submit the report for publication, including whether they will have ultimate authority over any of these activities | ___ 13 ___               |
|                                   | 5d      | Composition, roles, and responsibilities of the coordinating centre, steering committee, endpoint adjudication committee, data management team, and other individuals or groups overseeing the trial, if applicable (see Item 21a for data monitoring committee)                         | ___ 11, 12, ___          |

1 **Introduction**

2

3 Background and rationale 6a Description of research question and justification for undertaking the trial, including summary of relevant studies (published and unpublished) examining benefits and harms for each intervention \_\_\_\_\_ 3 \_\_\_\_\_

4

5

6 6b Explanation for choice of comparators 3,4, 8, 10

7

8 Objectives 7 Specific objectives or hypotheses \_\_\_\_\_ 4 \_\_\_\_\_

9

10 Trial design 8 Description of trial design including type of trial (eg, parallel group, crossover, factorial, single group), allocation ratio, and framework (eg, superiority, equivalence, noninferiority, exploratory) \_\_\_\_\_ 4 \_\_\_\_\_

11

12

13

14 **Methods: Participants, interventions, and outcomes**

15

16 Study setting 9 Description of study settings (eg, community clinic, academic hospital) and list of countries where data will be collected. Reference to where list of study sites can be obtained \_\_\_\_\_ 4 \_\_\_\_\_

17

18

19 Eligibility criteria 10 Inclusion and exclusion criteria for participants. If applicable, eligibility criteria for study centres and individuals who will perform the interventions (eg, surgeons, psychotherapists) \_\_\_\_\_ 4&5 \_\_\_\_\_

20

21

22 Interventions 11a Interventions for each group with sufficient detail to allow replication, including how and when they will be administered \_\_\_\_\_ 5-7 \_\_\_\_\_

23

24

25 11b Criteria for discontinuing or modifying allocated interventions for a given trial participant (eg, drug dose change in response to harms, participant request, or improving/worsening disease) \_\_\_\_\_ 9, 10 \_\_\_\_\_

26

27

28 11c Strategies to improve adherence to intervention protocols, and any procedures for monitoring adherence (eg, drug tablet return, laboratory tests) \_\_\_ 4,7,9,10, \_\_\_

29

30

31 11d Relevant concomitant care and interventions that are permitted or prohibited during the trial \_\_\_\_\_ 4,5 \_\_\_\_\_

32

33

34 Outcomes 12 Primary, secondary, and other outcomes, including the specific measurement variable (eg, systolic blood pressure), analysis metric (eg, change from baseline, final value, time to event), method of aggregation (eg, median, proportion), and time point for each outcome. Explanation of the clinical relevance of chosen efficacy and harm outcomes is strongly recommended \_\_\_ 8,9 & supp.mat \_\_\_\_\_

35

36

37

38

39

40 Participant timeline 13 Time schedule of enrolment, interventions (including any run-ins and washouts), assessments, and visits for participants. A schematic diagram is highly recommended (see Figure) \_\_\_ 5,6,7 (see Figures 1 and 2)

41

42

43

44

45

46

|   |             |    |                                                                                                                                                                                       |               |
|---|-------------|----|---------------------------------------------------------------------------------------------------------------------------------------------------------------------------------------|---------------|
| 1 | Sample size | 14 | Estimated number of participants needed to achieve study objectives and how it was determined, including clinical and statistical assumptions supporting any sample size calculations | ___ 9-10 ___  |
| 2 |             |    |                                                                                                                                                                                       |               |
| 3 |             |    |                                                                                                                                                                                       |               |
| 4 | Recruitment | 15 | Strategies for achieving adequate participant enrolment to reach target sample size                                                                                                   | ___ 4, 10 ___ |
| 5 |             |    |                                                                                                                                                                                       |               |

6 **Methods: Assignment of interventions (for controlled trials)**

|    |                                  |     |                                                                                                                                                                                                                                                                                                                                                          |                      |
|----|----------------------------------|-----|----------------------------------------------------------------------------------------------------------------------------------------------------------------------------------------------------------------------------------------------------------------------------------------------------------------------------------------------------------|----------------------|
| 8  | Allocation:                      |     |                                                                                                                                                                                                                                                                                                                                                          |                      |
| 9  |                                  |     |                                                                                                                                                                                                                                                                                                                                                          |                      |
| 10 | Sequence generation              | 16a | Method of generating the allocation sequence (eg, computer-generated random numbers), and list of any factors for stratification. To reduce predictability of a random sequence, details of any planned restriction (eg, blocking) should be provided in a separate document that is unavailable to those who enrol participants or assign interventions | ___ 5 ___            |
| 11 |                                  |     |                                                                                                                                                                                                                                                                                                                                                          |                      |
| 12 |                                  |     |                                                                                                                                                                                                                                                                                                                                                          |                      |
| 13 |                                  |     |                                                                                                                                                                                                                                                                                                                                                          |                      |
| 14 |                                  |     |                                                                                                                                                                                                                                                                                                                                                          |                      |
| 15 |                                  |     |                                                                                                                                                                                                                                                                                                                                                          |                      |
| 16 | Allocation concealment mechanism | 16b | Mechanism of implementing the allocation sequence (eg, central telephone; sequentially numbered, opaque, sealed envelopes), describing any steps to conceal the sequence until interventions are assigned                                                                                                                                                | ___ 5 ___            |
| 17 |                                  |     |                                                                                                                                                                                                                                                                                                                                                          |                      |
| 18 |                                  |     |                                                                                                                                                                                                                                                                                                                                                          |                      |
| 19 |                                  |     |                                                                                                                                                                                                                                                                                                                                                          |                      |
| 20 | Implementation                   | 16c | Who will generate the allocation sequence, who will enrol participants, and who will assign participants to interventions                                                                                                                                                                                                                                | ___ 5 ___            |
| 21 |                                  |     |                                                                                                                                                                                                                                                                                                                                                          |                      |
| 22 |                                  |     |                                                                                                                                                                                                                                                                                                                                                          |                      |
| 23 |                                  |     |                                                                                                                                                                                                                                                                                                                                                          |                      |
| 24 | Blinding (masking)               | 17a | Who will be blinded after assignment to interventions (eg, trial participants, care providers, outcome assessors, data analysts), and how                                                                                                                                                                                                                | n/a open label trial |
| 25 |                                  |     |                                                                                                                                                                                                                                                                                                                                                          |                      |
| 26 |                                  |     |                                                                                                                                                                                                                                                                                                                                                          |                      |
| 27 |                                  | 17b | If blinded, circumstances under which unblinding is permissible, and procedure for revealing a participant's allocated intervention during the trial                                                                                                                                                                                                     | ___ n/a ___          |
| 28 |                                  |     |                                                                                                                                                                                                                                                                                                                                                          |                      |
| 29 |                                  |     |                                                                                                                                                                                                                                                                                                                                                          |                      |
| 30 |                                  |     |                                                                                                                                                                                                                                                                                                                                                          |                      |

31 **Methods: Data collection, management, and analysis**

|    |                         |     |                                                                                                                                                                                                                                                                                                                                                                                                              |              |
|----|-------------------------|-----|--------------------------------------------------------------------------------------------------------------------------------------------------------------------------------------------------------------------------------------------------------------------------------------------------------------------------------------------------------------------------------------------------------------|--------------|
| 32 |                         |     |                                                                                                                                                                                                                                                                                                                                                                                                              |              |
| 33 | Data collection methods | 18a | Plans for assessment and collection of outcome, baseline, and other trial data, including any related processes to promote data quality (eg, duplicate measurements, training of assessors) and a description of study instruments (eg, questionnaires, laboratory tests) along with their reliability and validity, if known. Reference to where data collection forms can be found, if not in the protocol | ___ 7, 8 ___ |
| 34 |                         |     |                                                                                                                                                                                                                                                                                                                                                                                                              |              |
| 35 |                         |     |                                                                                                                                                                                                                                                                                                                                                                                                              |              |
| 36 |                         |     |                                                                                                                                                                                                                                                                                                                                                                                                              |              |
| 37 |                         |     |                                                                                                                                                                                                                                                                                                                                                                                                              |              |
| 38 |                         |     |                                                                                                                                                                                                                                                                                                                                                                                                              |              |
| 39 |                         | 18b | Plans to promote participant retention and complete follow-up, including list of any outcome data to be collected for participants who discontinue or deviate from intervention protocols                                                                                                                                                                                                                    | ___ 7-9 ___  |
| 40 |                         |     |                                                                                                                                                                                                                                                                                                                                                                                                              |              |
| 41 |                         |     |                                                                                                                                                                                                                                                                                                                                                                                                              |              |
| 42 |                         |     |                                                                                                                                                                                                                                                                                                                                                                                                              |              |

|    |                                 |     |                                                                                                                                                                                                                                                                                                                                       |             |
|----|---------------------------------|-----|---------------------------------------------------------------------------------------------------------------------------------------------------------------------------------------------------------------------------------------------------------------------------------------------------------------------------------------|-------------|
| 1  | Data management                 | 19  | Plans for data entry, coding, security, and storage, including any related processes to promote data quality (eg, double data entry; range checks for data values). Reference to where details of data management procedures can be found, if not in the protocol                                                                     | __ 7, 8, __ |
| 2  |                                 |     |                                                                                                                                                                                                                                                                                                                                       |             |
| 3  |                                 |     |                                                                                                                                                                                                                                                                                                                                       |             |
| 4  |                                 |     |                                                                                                                                                                                                                                                                                                                                       |             |
| 5  | Statistical methods             | 20a | Statistical methods for analysing primary and secondary outcomes. Reference to where other details of the statistical analysis plan can be found, if not in the protocol                                                                                                                                                              | __ 8 - 10__ |
| 6  |                                 |     |                                                                                                                                                                                                                                                                                                                                       |             |
| 7  |                                 |     |                                                                                                                                                                                                                                                                                                                                       |             |
| 8  |                                 | 20b | Methods for any additional analyses (eg, subgroup and adjusted analyses)                                                                                                                                                                                                                                                              | __ 10__     |
| 9  |                                 |     |                                                                                                                                                                                                                                                                                                                                       |             |
| 10 |                                 | 20c | Definition of analysis population relating to protocol non-adherence (eg, as randomised analysis), and any statistical methods to handle missing data (eg, multiple imputation)                                                                                                                                                       | __ 10__     |
| 11 |                                 |     |                                                                                                                                                                                                                                                                                                                                       |             |
| 12 |                                 |     |                                                                                                                                                                                                                                                                                                                                       |             |
| 13 |                                 |     |                                                                                                                                                                                                                                                                                                                                       |             |
| 14 | <b>Methods: Monitoring</b>      |     |                                                                                                                                                                                                                                                                                                                                       |             |
| 15 |                                 |     |                                                                                                                                                                                                                                                                                                                                       |             |
| 16 | Data monitoring                 | 21a | Composition of data monitoring committee (DMC); summary of its role and reporting structure; statement of whether it is independent from the sponsor and competing interests; and reference to where further details about its charter can be found, if not in the protocol. Alternatively, an explanation of why a DMC is not needed | __ 12__     |
| 17 |                                 |     |                                                                                                                                                                                                                                                                                                                                       |             |
| 18 |                                 |     |                                                                                                                                                                                                                                                                                                                                       |             |
| 19 |                                 |     |                                                                                                                                                                                                                                                                                                                                       |             |
| 20 |                                 |     |                                                                                                                                                                                                                                                                                                                                       |             |
| 21 |                                 |     |                                                                                                                                                                                                                                                                                                                                       |             |
| 22 |                                 | 21b | Description of any interim analyses and stopping guidelines, including who will have access to these interim results and make the final decision to terminate the trial                                                                                                                                                               | __ 9__      |
| 23 |                                 |     |                                                                                                                                                                                                                                                                                                                                       |             |
| 24 |                                 |     |                                                                                                                                                                                                                                                                                                                                       |             |
| 25 | Harms                           | 22  | Plans for collecting, assessing, reporting, and managing solicited and spontaneously reported adverse events and other unintended effects of trial interventions or trial conduct                                                                                                                                                     | __ 7__      |
| 26 |                                 |     |                                                                                                                                                                                                                                                                                                                                       |             |
| 27 |                                 |     |                                                                                                                                                                                                                                                                                                                                       |             |
| 28 | Auditing                        | 23  | Frequency and procedures for auditing trial conduct, if any, and whether the process will be independent from investigators and the sponsor                                                                                                                                                                                           | __ 8__      |
| 29 |                                 |     |                                                                                                                                                                                                                                                                                                                                       |             |
| 30 |                                 |     |                                                                                                                                                                                                                                                                                                                                       |             |
| 31 |                                 |     |                                                                                                                                                                                                                                                                                                                                       |             |
| 32 | <b>Ethics and dissemination</b> |     |                                                                                                                                                                                                                                                                                                                                       |             |
| 33 |                                 |     |                                                                                                                                                                                                                                                                                                                                       |             |
| 34 | Research ethics approval        | 24  | Plans for seeking research ethics committee/institutional review board (REC/IRB) approval                                                                                                                                                                                                                                             | __ 12__     |
| 35 |                                 |     |                                                                                                                                                                                                                                                                                                                                       |             |
| 36 |                                 |     |                                                                                                                                                                                                                                                                                                                                       |             |
| 37 | Protocol amendments             | 25  | Plans for communicating important protocol modifications (eg, changes to eligibility criteria, outcomes, analyses) to relevant parties (eg, investigators, REC/IRBs, trial participants, trial registries, journals, regulators)                                                                                                      | __ 12__     |
| 38 |                                 |     |                                                                                                                                                                                                                                                                                                                                       |             |
| 39 |                                 |     |                                                                                                                                                                                                                                                                                                                                       |             |
| 40 |                                 |     |                                                                                                                                                                                                                                                                                                                                       |             |
| 41 |                                 |     |                                                                                                                                                                                                                                                                                                                                       |             |
| 42 |                                 |     |                                                                                                                                                                                                                                                                                                                                       |             |
| 43 |                                 |     |                                                                                                                                                                                                                                                                                                                                       |             |
| 44 |                                 |     |                                                                                                                                                                                                                                                                                                                                       |             |
| 45 |                                 |     |                                                                                                                                                                                                                                                                                                                                       |             |
| 46 |                                 |     |                                                                                                                                                                                                                                                                                                                                       |             |

|    |                               |     |                                                                                                                                                                                                                                                                                     |                      |
|----|-------------------------------|-----|-------------------------------------------------------------------------------------------------------------------------------------------------------------------------------------------------------------------------------------------------------------------------------------|----------------------|
| 1  | Consent or assent             | 26a | Who will obtain informed consent or assent from potential trial participants or authorised surrogates, and how (see Item 32)                                                                                                                                                        | 6 and figure 2       |
| 2  |                               |     |                                                                                                                                                                                                                                                                                     |                      |
| 3  |                               |     |                                                                                                                                                                                                                                                                                     |                      |
| 4  |                               | 26b | Additional consent provisions for collection and use of participant data and biological specimens in ancillary studies, if applicable                                                                                                                                               | _____n/a_____        |
| 5  |                               |     |                                                                                                                                                                                                                                                                                     |                      |
| 6  |                               |     |                                                                                                                                                                                                                                                                                     |                      |
| 7  | Confidentiality               | 27  | How personal information about potential and enrolled participants will be collected, shared, and maintained in order to protect confidentiality before, during, and after the trial                                                                                                | _____7_____          |
| 8  |                               |     |                                                                                                                                                                                                                                                                                     |                      |
| 9  |                               |     |                                                                                                                                                                                                                                                                                     |                      |
| 10 | Declaration of interests      | 28  | Financial and other competing interests for principal investigators for the overall trial and each study site                                                                                                                                                                       | _____13_____         |
| 11 |                               |     |                                                                                                                                                                                                                                                                                     |                      |
| 12 |                               |     |                                                                                                                                                                                                                                                                                     |                      |
| 13 | Access to data                | 29  | Statement of who will have access to the final trial dataset, and disclosure of contractual agreements that limit such access for investigators                                                                                                                                     | _____13_____         |
| 14 |                               |     |                                                                                                                                                                                                                                                                                     |                      |
| 15 |                               |     |                                                                                                                                                                                                                                                                                     |                      |
| 16 | Ancillary and post-trial care | 30  | Provisions, if any, for ancillary and post-trial care, and for compensation to those who suffer harm from trial participation                                                                                                                                                       | _____n/a_____        |
| 17 |                               |     |                                                                                                                                                                                                                                                                                     |                      |
| 18 |                               |     |                                                                                                                                                                                                                                                                                     |                      |
| 19 |                               |     |                                                                                                                                                                                                                                                                                     |                      |
| 20 | Dissemination policy          | 31a | Plans for investigators and sponsor to communicate trial results to participants, healthcare professionals, the public, and other relevant groups (eg, via publication, reporting in results databases, or other data sharing arrangements), including any publication restrictions | _____12_____         |
| 21 |                               |     |                                                                                                                                                                                                                                                                                     |                      |
| 22 |                               |     |                                                                                                                                                                                                                                                                                     |                      |
| 23 |                               |     |                                                                                                                                                                                                                                                                                     |                      |
| 24 |                               | 31b | Authorship eligibility guidelines and any intended use of professional writers                                                                                                                                                                                                      | _____none_____       |
| 25 |                               |     |                                                                                                                                                                                                                                                                                     |                      |
| 26 |                               | 31c | Plans, if any, for granting public access to the full protocol, participant-level dataset, and statistical code                                                                                                                                                                     | _____none_____       |
| 27 |                               |     |                                                                                                                                                                                                                                                                                     |                      |
| 28 |                               |     |                                                                                                                                                                                                                                                                                     |                      |
| 29 | <b>Appendices</b>             |     |                                                                                                                                                                                                                                                                                     |                      |
| 30 |                               |     |                                                                                                                                                                                                                                                                                     |                      |
| 31 | Informed consent materials    | 32  | Model consent form and other related documentation given to participants and authorised surrogates                                                                                                                                                                                  | available on request |
| 32 |                               |     |                                                                                                                                                                                                                                                                                     |                      |
| 33 |                               |     |                                                                                                                                                                                                                                                                                     |                      |
| 34 | Biological specimens          | 33  | Plans for collection, laboratory evaluation, and storage of biological specimens for genetic or molecular analysis in the current trial and for future use in ancillary studies, if applicable                                                                                      | _____none_____       |
| 35 |                               |     |                                                                                                                                                                                                                                                                                     |                      |
| 36 |                               |     |                                                                                                                                                                                                                                                                                     |                      |

37 \*It is strongly recommended that this checklist be read in conjunction with the SPIRIT 2013 Explanation & Elaboration for important clarification on the items.  
 38 Amendments to the protocol should be tracked and dated. The SPIRIT checklist is copyrighted by the SPIRIT Group under the Creative Commons  
 39 "[Attribution-NonCommercial-NoDerivs 3.0 Unported](#)" license.  
 40

# BMJ Open

## PROcalcitonin and NEWS2 evaluation for Timely identification of sepsis and Optimal use of antibiotics in the emergency department (PRONTO): protocol for a multicentre, open label, randomised controlled trial

|                                 |                                                                                                                                                                                                                                                                                                                                                                                                                                                                                                                                                                                                                                                                                                                                                                                                                                                                                                                                                                                                                                                                                                                                                                                                                                                                                                                                                                                                                                                                                                                                                                                                                                                                                                                                                                                         |
|---------------------------------|-----------------------------------------------------------------------------------------------------------------------------------------------------------------------------------------------------------------------------------------------------------------------------------------------------------------------------------------------------------------------------------------------------------------------------------------------------------------------------------------------------------------------------------------------------------------------------------------------------------------------------------------------------------------------------------------------------------------------------------------------------------------------------------------------------------------------------------------------------------------------------------------------------------------------------------------------------------------------------------------------------------------------------------------------------------------------------------------------------------------------------------------------------------------------------------------------------------------------------------------------------------------------------------------------------------------------------------------------------------------------------------------------------------------------------------------------------------------------------------------------------------------------------------------------------------------------------------------------------------------------------------------------------------------------------------------------------------------------------------------------------------------------------------------|
| Journal:                        | <i>BMJ Open</i>                                                                                                                                                                                                                                                                                                                                                                                                                                                                                                                                                                                                                                                                                                                                                                                                                                                                                                                                                                                                                                                                                                                                                                                                                                                                                                                                                                                                                                                                                                                                                                                                                                                                                                                                                                         |
| Manuscript ID                   | bmjopen-2022-063424.R1                                                                                                                                                                                                                                                                                                                                                                                                                                                                                                                                                                                                                                                                                                                                                                                                                                                                                                                                                                                                                                                                                                                                                                                                                                                                                                                                                                                                                                                                                                                                                                                                                                                                                                                                                                  |
| Article Type:                   | Protocol                                                                                                                                                                                                                                                                                                                                                                                                                                                                                                                                                                                                                                                                                                                                                                                                                                                                                                                                                                                                                                                                                                                                                                                                                                                                                                                                                                                                                                                                                                                                                                                                                                                                                                                                                                                |
| Date Submitted by the Author:   | 05-May-2022                                                                                                                                                                                                                                                                                                                                                                                                                                                                                                                                                                                                                                                                                                                                                                                                                                                                                                                                                                                                                                                                                                                                                                                                                                                                                                                                                                                                                                                                                                                                                                                                                                                                                                                                                                             |
| Complete List of Authors:       | Euden, joanne; Cardiff University, Centre for Trials Research<br>Thomas-Jones, Emma; Cardiff University, Centre for Trials Research<br>Aston, Stephen; University of Liverpool, Institute of Infection, Veterinary and Ecological Sciences<br>Brookes-Howell, Lucy; Cardiff University, Centre for Trials Research<br>Carman, Julie; PPI representative<br>Carrol, Enitan; University of Liverpool, Institute of Infection, Veterinary and Ecological Sciences<br>Gilbert, Stephanie; Cardiff University, Centre for Trials Research<br>Howard, P; University of Leeds, School of Healthcare, Faculty of Medicine and Health<br>Hood, Kerenza; Cardiff University, Centre for trials Research<br>Inada-Kim, Matthew; Hampshire Hospitals NHS Foundation Trust, Acute Medicine; University of Southampton, NHS England and NHS Improvement<br>Llewelyn, Martin; Brighton and Sussex Medical School, Infectious Diseases and Therapeutics<br>McGill, Fiona; Leeds Teaching Hospitals NHS Trust<br>Milosevic, Sarah; Cardiff University, Centre for Trials Research<br>Niessen, Louis; Liverpool School of Tropical Medicine, Health Economics; Johns Hopkins, School of Public Health<br>Nsutebu, Emmanuel; Sheikh Shakhbout Medical City<br>Pallmann, Philip; Cardiff University, Centre for Trials Research<br>Schmidt, Paul; Portsmouth Hospitals NHS Trust<br>Taylor-Robinson, David; University of Liverpool, Department of Public Health, Policy and Systems<br>Welters, Ingeborg; University of Liverpool, Institute for Life Course and Medical Sciences<br>Todd, Stacy; Royal Liverpool and Broadgreen University Hospitals NHS Trust, Tropical and Infectious Disease Unit<br>French, Neil; University of Liverpool, Institute of Infection, Veterinary and Ecological Sciences |
| <b>Primary Subject Heading</b>: | Emergency medicine                                                                                                                                                                                                                                                                                                                                                                                                                                                                                                                                                                                                                                                                                                                                                                                                                                                                                                                                                                                                                                                                                                                                                                                                                                                                                                                                                                                                                                                                                                                                                                                                                                                                                                                                                                      |
| Secondary Subject Heading:      | Intensive care, Evidence based practice                                                                                                                                                                                                                                                                                                                                                                                                                                                                                                                                                                                                                                                                                                                                                                                                                                                                                                                                                                                                                                                                                                                                                                                                                                                                                                                                                                                                                                                                                                                                                                                                                                                                                                                                                 |

1  
2  
3  
4  
5  
6  
7  
8  
9  
10  
11  
12  
13  
14  
15  
16  
17  
18  
19  
20  
21  
22  
23  
24  
25  
26  
27  
28  
29  
30  
31  
32  
33  
34  
35  
36  
37  
38  
39  
40  
41  
42  
43  
44  
45  
46  
47  
48  
49  
50  
51  
52  
53  
54  
55  
56  
57  
58  
59  
60

|           |                                                                                                                                     |
|-----------|-------------------------------------------------------------------------------------------------------------------------------------|
| Keywords: | ACCIDENT & EMERGENCY MEDICINE, Infection control < INFECTIOUS DISEASES, Adult intensive & critical care < INTENSIVE & CRITICAL CARE |
|           |                                                                                                                                     |

SCHOLARONE™  
Manuscripts

# PROcalcitonin and NEWS2 evaluation for Timely identification of sepsis and Optimal use of antibiotics in the emergency department (PRONTO): protocol for a multicentre, open label, randomised controlled trial

Joanne Euden<sup>1</sup>, Emma Thomas-Jones<sup>1</sup>, Stephen Aston<sup>2</sup>, Lucy Brookes-Howell<sup>1</sup>, Julie Carman<sup>3</sup>, Enitan D Carrol<sup>2</sup>, Stephanie Gilbert<sup>1</sup>, Philip Howard<sup>4</sup>, Kerry Hood<sup>1</sup>, Matthew Inada-Kim<sup>5</sup>, Martin J Llewelyn<sup>6</sup>, Fiona McGill<sup>7</sup>, Sarah Milosevic<sup>1</sup>, Louis Niessen<sup>8</sup>, Emmanuel Nsutebu<sup>9</sup>, Philip Pallmann<sup>1</sup>, Paul Schmidt<sup>10</sup>, David Taylor-Robinson<sup>11</sup>, Ingeborg Welters<sup>12</sup>, Stacy Todd\*<sup>13</sup> Neil French\*<sup>2</sup> on behalf of the PRONTO team.

## Author affiliations

<sup>1</sup> Centre for Trials Research, College of Biomedical and Life Sciences, Cardiff University, Cardiff, UK

<sup>2</sup> Institute of Infection, Veterinary and Ecological Sciences, University of Liverpool, Liverpool, UK

<sup>3</sup> Public and Patient Representative

<sup>4</sup> School of Healthcare, Faculty of Medicine and Health, University of Leeds, Leeds, UK

<sup>5</sup> Royal Hampshire County Hospital, Hampshire Hospitals NHS Foundation Trust, Hampshire, UK. University of Southampton, NHS England and NHS Improvement

<sup>6</sup> Brighton and Sussex Medical School, University of Sussex, Brighton BN1 9PS, UK

<sup>7</sup> St James's University Hospital, Leeds Teaching Hospitals NHS Trust, Leeds, UK

<sup>8</sup> Liverpool School of Tropical Medicine, Liverpool, UK;

<sup>9</sup> Sheikh Shakhboub Medical City, Abu Dhabi, United Arab Emirates

<sup>10</sup> Queen Alexandra Hospital, Portsmouth Hospitals NHS Trust, Portsmouth, UK

<sup>11</sup> Department of Public Health, Policy and Systems, University of Liverpool, Liverpool, UK

<sup>12</sup> Institute for Life Course and Medical Sciences, University of Liverpool, Liverpool, UK

<sup>13</sup> Tropical and Infectious Disease Unit, Liverpool University Hospitals NHS Foundation Trust, Liverpool, UK

\*Dr S. Todd and Professor N. French are co-Chief Investigators.

## Correspondence to:

Joanne Euden, 7<sup>th</sup> floor Neuadd Meirionnydd, Heath Park, Cardiff, CF14 4YS

[eudenj@cardiff.ac.uk](mailto:eudenj@cardiff.ac.uk)

**Word Count 3,924 (excluding tables and acknowledgements)**



## ABSTRACT

**Introduction:** Sepsis is a common, potentially life-threatening complication of infection. The optimal treatment for sepsis includes prompt antibiotics and intravenous fluids, facilitated by its early and accurate recognition. Currently, clinicians identify and assess severity of suspected sepsis using validated clinical scoring systems. In England, the National Early Warning Score 2 (NEWS2) has been mandated across all NHS trusts and ambulance organisations. Like many clinical scoring systems, NEWS2 should not be used without clinical judgement to determine either the level of acuity or a diagnosis. Despite this, there is a tendency to over-emphasise the score in isolation in patients with suspected infection, leading to the over-prescription of antibiotics, and potentially treatment-related complications and rising antimicrobial resistance. The biomarker procalcitonin (PCT) has been shown to be useful in specific circumstances to support appropriate antibiotics prescribing by identifying bacterial infection. PCT is not routinely used in the care of undifferentiated patients presenting to emergency departments (EDs), and the evidence-base of its optimal usage is poor. The PRONTO study is a randomised controlled trial in adults with suspected sepsis presenting to the ED to compare standard clinical management based on NEWS2 scoring plus PCT guided risk assessment with standard clinical management based on NEWS2 scoring alone and compare if this approach reduces prescriptions of antibiotics without increasing mortality.

**Methods and analysis:** PRONTO is a parallel two-arm open-label individually randomised controlled trial (RCT) set in up to 20 NHS EDs in the UK with a target sample size of 7676 participants. Participants will be randomised in a ratio of 1:1 to standard clinical management based on NEWS2 scoring or standard clinical management based on NEWS2 scoring plus PCT guided risk assessment. We will compare whether the addition of PCT measurement to NEWS2 scoring can lead to a reduction in intravenous antibiotic initiation in ED patients managed as suspected sepsis, with at least no increase in 28-day mortality compared to NEWS2 scoring alone (in conjunction with local standard care pathways). PRONTO has two co-primary endpoints: initiation of IV antibiotics at three hours (superiority comparison) and 28-day mortality (non-inferiority comparison). The study has an internal pilot phase and group-sequential stopping rules for effectiveness and futility/safety, as well as a qualitative sub-study and a health economic evaluation.

**Ethics and dissemination:** The trial protocol was approved by the HRA and NHS Research Ethics Committee (Wales REC 2, reference 20/WA/0058). In England and Wales, the law allows the use of deferred consent in approved research situations (including emergency department studies) where the time dependent nature of intervention would not allow true informed consent to be obtained. PRONTO has approval for a deferred consent process to be used. Findings will be disseminated through peer-reviewed journals and presented at scientific conferences.

**Trial registration number:** ISRCTN54006056.

### Strengths and limitations of this study

- Sepsis has a problem with both over and under diagnosis, and a major strength of PRONTO is the use of co-primary outcomes to assess effectiveness as an antimicrobial stewardship intervention but also to ensure safety which is vital for widespread clinical adoption of this intervention.

- PRONTO is designed to integrate into routine UK clinical pathways and includes assessment of acceptability and practicality in emergency department settings.
- Limitations of the study design include the intervention being a change in risk assessment rather than a formal prescribe/don't prescribe rule for antibiotic use, which could lead to higher rate of clinician preference in the study.
- The use of deferred consent also has the potential to increase participant withdrawal from the trial, as not all patients would have agreed to prospective informed consent.

**Protocol version:** PRONTO Protocol 2.1 27.01.22

**Keywords:** Emergency departments, sepsis, antibiotic stewardship, procalcitonin

## INTRODUCTION

Sepsis is defined as life-threatening organ dysfunction caused by a dysregulated host response to infection [1] and is a medical emergency requiring prompt antimicrobial therapy and physiological support. The identification, assessment and management of sepsis is challenging because of its many non-specific symptoms and signs, which can be caused by both infectious and non-infectious diseases. In line with international recommendations, the UK National Institute for Health and Care Excellence (NICE) sepsis guidelines suggest the administration of intravenous antibiotics within an hour in patients at risk of Intensive Care Unit (ICU) admission and death [2]. However, up to 50% of patients initially managed as sepsis in the emergency department (ED) do not have a final diagnosis of sepsis [3 4] and often do not have an infection [5 6]. The current approach leads to overuse of antibiotics with the associated risk of antimicrobial resistance (AMR), antibiotic-related adverse drug reactions (e.g. *C. difficile* infection) [7], and extended hospital stays.

The challenge of delivering high quality sepsis care in an ED setting has been well recognised [8 9]. The third international consensus definition (Sepsis 3) [1] recommended use of the quick Sequential Organ Failure Assessment (qSOFA) score, to identify patients at high risk of death and prolonged ICU stay. NEWS and NEWS2 are rapid physiology-based scoring systems which are used to detect and track the deteriorating patient. NEWS has been demonstrated to have better diagnostic accuracy to qSOFA in detection of severe outcomes in sepsis [10 11]. However, with its higher sensitivity comes reduced specificity which can result in significant increased numbers of patients being managed as high risk for suspected sepsis with a corresponding pressure on ED departments. NEWS2 replaced NEWS scoring system as the standard monitoring tool in the NHS in 2019 [12] and has been found to be comparable or superior to NEWS [13-16]. In October 2021, Surviving Sepsis Campaign recommended that immediate antibiotics (within one hour) should be targeted to those with septic shock and others with suspected sepsis could wait for up to three hours for initial assessment to target antimicrobial choice or identify non-infectious mimics [17].

The emergence of COVID-19 has exacerbated this previously highlighted problem. COVID-19 is a viral infection which presents within the sepsis syndrome constellation. Secondary bacterial infections are uncommon at presentation to ED (3.5%) [18], despite this up to 83% of patients with COVID-19 received antibiotics [19 20]. NEWS2 scores are broadly predictive of COVID-19 outcome on presentation but does not appear to be predictive of bacterial co-infection [21]. Initial investigations in

1  
2  
3 the ED can be helpful in distinguishing between COVID-19 and bacterial pneumonia including typical  
4 radiographic change, and COVID-19 point-of-care diagnostics [8]. These results would be available  
5 within three hours for assessment and could potentially reduce unnecessary antimicrobial usage in  
6 COVID-19 management.  
7

8  
9 Procalcitonin (PCT) is a reliable biomarker that changes early in the course of bacterial infection. A  
10 recent PCT is currently the biomarker with the most available evidence to identify bacterial infections  
11 and inform antibiotic prescription decisions. Cochrane meta-analysis [9] demonstrated that the use of  
12 PCT to guide antibiotic treatment in patients with acute respiratory infections reduced antibiotic  
13 exposure and side-effects, and improved survival. Nevertheless, while the US FDA has approved PCT  
14 assays for use in sepsis, current UK NICE guidance does not recommend PCT use on the basis of  
15 insufficient evidence [22 23]. PCT predictive of outcome in COVID-19, and this may be because of its  
16 ability to identify superadded bacterial infection [10 11 24]. The available evidence suggests a low PCT  
17 will have good negative predictive value for a bacterial co-infection in cases of COVID-19 [25].  
18  
19  
20  
21  
22  
23

## 24 **Aims and objectives**

### 25 **Primary objective**

26  
27 To assess whether the addition of Procalcitonin (PCT) measurement to NEWS2 scoring leads to a  
28 reduction in IV antibiotic initiation at three hours, with no increase in 28-day mortality compared to  
29 NEWS2 scoring alone in the management of patients presenting to hospital EDs in England and Wales  
30 with suspected sepsis.  
31  
32  
33  
34  
35  
36

### 37 **Secondary objective**

38  
39 The assessment of a) feasibility, b) cost-effectiveness and c) acceptability to healthcare practitioners,  
40 patients and their family  
41  
42  
43  
44  
45  
46

## 47 **METHODS AND ANALYSIS**

### 48 **Study design**

49  
50 PRONTO is a multi-centre, parallel two-arm, open-label, individually randomised controlled trial with  
51 two co-primary endpoints, an internal pilot phase and group-sequential stopping rules for effectiveness  
52 and futility/safety. Participants will be randomised in a ratio of 1:1 to standard clinical management  
53 based on NEWS2 scoring or standard clinical management based on NEWS2 scoring plus PCT guided  
54 risk assessment.  
55  
56  
57  
58  
59  
60

## Internal Pilot

An internal pilot phase will be conducted over the first nine months of the recruitment period with ten lead sites. Predefined progression criteria will be used to assess feasibility to progress to the full trial, such as site and patient absolute recruitment and consent rate, proportion of patients undergoing PCT assessments and the ability to collect co-primary outcome data.

## Eligibility

### Inclusion criteria

Up to 20 EDs from across England and Wales will recruit adults ( $\geq 16$  years) who are being managed as suspected sepsis over a 24-month period. There is no minimum NEWS2 score for inclusion into the study.

### Exclusion criteria

Patients already receiving intravenous (IV) antibiotics, currently receiving myeloablative chemotherapy, patients with solid organ transplantation, allogeneic bone marrow or stem cell transplantation within 3 months prior to consent or patients known to require urgent surgical intervention at the time of randomisation.

Patients with an advance directive to withhold life-sustaining treatment or patients not wishing to receive cardiopulmonary resuscitation (CPR) may qualify provided they receive all other resuscitative measures e.g. respiratory support and fluid resuscitation.

## Study procedures and progress

The trial schema is shown in Figure 1.

The COVID-19 pandemic resulted in a delay to the original start date of June 2020. First participant was recruited on 20 November 2020. Current planned end date is 30 November 2022.

## Identification and screening

Patients with suspected sepsis will be identified at ED triage. After initial NEWS2 scoring and assessment according to current standard of care the eligibility criteria will be assessed and if no exclusion criteria apply, patients will be enrolled into the trial and randomised. A screening log of all eligible and randomised patients will be kept at each site so that any biases from differential recruitment will be detected.

## Randomisation

Participants will be individually randomised in a 1:1 ratio by delegated research staff within the ED to either to standard clinical management based on NEWS2 scoring (control) or standard clinical

management based on NEWS2 scoring plus PCT guided risk assessment (intervention). We will use minimisation with NEWS2 score ( $\geq$  or  $<$  5) and site as balancing factors and add a random element to reduce the risk of subversion[26]. This will be implemented in a secure 24-hour web-based randomisation programme controlled centrally by the Centre for Trials Research (CTR) in Cardiff. Full details are provided in the PRONTO randomisation strategy.

## Trial intervention

The BRAHMS PCT-direct reader (ThermoFisher Diagnostics Ltd, (Altrincham, Cheshire, UK) is a fully validated, CE-marked point-of-care test to determine levels of PCT in the blood. The test requires 20  $\mu$ l blood which will be obtained from either venous blood during standard care procedures at triage or via a finger-prick. This will be used in combination with NEWS2 assessment of adult patients with suspected sepsis in ED, using a guidance-only algorithm for clinicians (Figure 1). The risk algorithm categorises individuals as low, medium or high risk, interpretation and management (table 1). Clinicians have oversight at all times as to whether to adhere to the algorithm As currently mandated in UK, NICE clinical guidelines and quality standard QS161 [27], urgent senior review within an hour will take place should any healthcare provider identify at least one risk factor indicating high risk of progression to severe illness or death regardless of underlying aetiology. This equates to a NEWS2  $\geq$  5 or an individual having a single feature of the evidence-based ‘NICE high-risk criterion’.

**Table 1. Clinical risk management interpretation**

| Risk group | Interpretation                                                                                                                                                                                                                                                                                                                         |
|------------|----------------------------------------------------------------------------------------------------------------------------------------------------------------------------------------------------------------------------------------------------------------------------------------------------------------------------------------|
| High       | High risk of progression to sepsis. Likely benefit from immediate antibiotics (within 1 hour)                                                                                                                                                                                                                                          |
| Medium     | Medium risk of progression to sepsis. likely benefit from early antibiotics (within 3 hours) but consider non-bacterial sources and likely source. Allows clinical teams time to complete rapid assessment<br><br>In patients with high NEWS2 but low PCT ( $<$ 0.5) explicit advice to consider non-infectious causes of presentation |
| Low        | Low risk of progression to sepsis. consider non-bacterial sources, likely source and whether requires antibiotics                                                                                                                                                                                                                      |

## Informed consent

Research carried out in emergency situations is challenging in terms of obtaining consent. Emergency research is when treatment needs to be given urgently, and it is necessary to take urgent action for the purposes of the study. In some emergency situations people may lack capacity to give consent

1  
2  
3 themselves and obtaining consent from a legal representative or consulting others is not reasonably  
4 practicable. In England and Wales, the law allows adults who lack capacity to take part in emergency  
5 research without prior consent from a legal representative or consulting others, if certain conditions are  
6 met (Medicines for Human Use (Clinical Trials) Amendment (No 2) Regulations SI 2006 2984, Mental  
7 Capacity Act s32) [28]. Given the requirement for rapid clinical assessment and treatment in the  
8 management of suspected sepsis, for this trial we will use a deferred consent model. Patients and their  
9 relatives will be informed that a study is ongoing but a lengthy consent discussion will not be had so as  
10 not to delay treatment. Should the patient or consultee wish not to take part at this point, then the  
11 decision will be respected and the patient will not be enrolled into the trial. Following randomisation  
12 an approach to obtain informed consent will be made as soon as is practicably feasible, ideally within  
13 72 hours (Figure 2). Where a participant lacks mental capacity, a maximum of three approaches will be  
14 made. After three approaches, or if the participant is not likely to regain mental capacity, a personal  
15 consultee will be approached. In extreme circumstances, where no personal consultee can be identified,  
16 a nominated consultee will be approached. Separate informed consent will be taken for participation in  
17 the qualitative data collection. Patients who do not consent to continue in the study will be withdrawn  
18 completely from the study. A tiered consent model is used in this study and allows participants to  
19 consent to different aspects of the study (Supplementary Appendix Table 1). An example participant  
20 consent form is available in supplementary appendix.

### 26 **Data collection during primary admission**

27  
28  
29 All data collection will be by electronic data capture using a bespoke database developed by the CTR  
30 and hosted by Cardiff University secure servers. It is encrypted and accessed by individual username  
31 and password. Paper copies of all case report forms (CRFs) will be available. Essential documents will  
32 be kept securely in a locked cupboard, and at the end of the trial, will be archived at an approved external  
33 storage facility for 10 years. A member of the research team in ED will undertake the data collection  
34 relating to the NEWS2 screening, trial intervention and whether clinical teams followed the intervention  
35 or standard of care risk assessment. Participants who consent to continue in the study will have daily  
36 information collected from the date of randomisation until they are discharged from hospital or until  
37 day 28, whichever is sooner. Trial data is collected from patients' health records and no trial visits occur  
38 between consent and day 28. Key follow-up data is listed in supplementary appendix table 2.

### 42 **Follow up**

#### 45 **28 Day Follow Up**

46  
47 Day 28 follow-ups will be conducted via telephone or in person if remains an inpatient. These will  
48 comprise an EQ-5D/5L validated questionnaire for participant or proxy completion, and a Health  
49 Economics questionnaire where patient outcomes (readmission, re-treatment, hospital-acquired  
50 infection) and use of healthcare resource (hospital admissions, outpatient parenteral antimicrobial  
51 therapy, other prescribed medicines, privately purchased over-the-counter medicines, GP and hospital  
52 outpatient attendance) will be captured. In addition, direct non-medical costs borne by patients/carers  
53 as a result of attending hospital (travel costs, childcare costs, expenses incurred while in hospital, self-  
54 reported lost earnings and other direct non-medical expenses) will be collected.

#### 58 **90 Day Follow Up**

EQ-5D/5L questionnaires will be repeated and a shortened Health Economics questionnaire to capture any additional costs or hospital admissions since the Day 28 questionnaires will be completed.

## Withdrawal

Participants have the right to withdraw from the study at any time and can request that all data collected up to that point is not used.

## Safety and pharmacovigilance

The trial population comprises unwell hospital inpatients. Events such as prolongation of existing hospitalisation, life threatening events and death are expected in this population and are recorded as part of routine data collection and therefore are not subject to expedited reporting. Serious adverse events will be reported if the event results in persistent or significant disability or incapacity or consists of a congenital anomaly or birth defect. An assessment of causality between the event and the trial intervention will be carried out by the principal investigator or delegated clinician, and then independently by a clinical reviewer. If the clinical reviewer classifies the event as probably or definitely caused by the intervention, it will be classified as a serious adverse reaction. Non-serious AEs potentially attributable to PCT test will be collected as part of routine follow up at 28 days. Any other non-serious AEs will not be collected.

## Data management

Details of data management procedures (such as checking for missing, illegible or unusual value (range checks) will be specified in the PRONTO Data Management Plan. Details of Monitoring procedures will be specified in the PRONTO Monitoring plan.

## Statistical analysis

### Outcome measures

The co-primary outcomes of this study are the initiation of IV antibiotics at three hours (intervention arm to be shown superior to control) and 28-day mortality (intervention arm to be shown non-inferior to control). Co-primary and secondary outcomes are listed in Table 2. Final decisions about the primary effectiveness of the intervention, using these co-primary outcomes will be made based on the decision matrix (Table 3). All outcomes will be stratified by COVID-19 diagnosis (SARS-CoV2 PCR positive or high likelihood of clinical COVID-19 as determined by a senior clinician).

**Table 2. Co-primary and secondary outcomes**

|                                                                                                                                                                          |
|--------------------------------------------------------------------------------------------------------------------------------------------------------------------------|
| Co-primary outcome measures:                                                                                                                                             |
| <ul style="list-style-type: none"> <li>Intravenous antimicrobial initiation – binary outcome assessed at 3 hours.</li> <li>28-day mortality – binary outcome.</li> </ul> |
| Secondary outcome measures:                                                                                                                                              |
| <ul style="list-style-type: none"> <li>Time until initiation of IV antibiotic therapy.</li> </ul>                                                                        |

- Late IV antibiotic initiation – antibiotics commenced after 3 hours.
- Number of days on IV antibiotics (during admission and total over the first 28 days).
- Number of days on any antibiotic (during admission and total over the first 28 days).
- Number of days on broad spectrum antibiotics (IV and oral), defined by number of days on an Access group of antibiotics as defined by WHO [AWaRe Classification Database](#) (during admission and total over the first 28 days).
- ICU admission – at any point during admission.
- Length of ICU stay.
- Length of hospital stay.
- Adverse antibiotic outcomes.
- Readmission to hospital within 90 days.
- Mortality within 90 days (and time until death).
- Health utility (EQ-5D/5L) at 28 and 90 days.
- Health resource usage.
- Feasibility of implementing PCT testing alongside NEWS2 scoring in EDs .
- Acceptability of implementing PCT testing alongside NEWS2 scoring in EDs, to patients, carers and clinicians..
- Total average cost per patient per arm and cost per gained (health-adjusted) life year

**Table 3. Decision matrix for co-primary outcomes**

|                      | Reduced antibiotic initiation | Same or more antibiotic initiation |
|----------------------|-------------------------------|------------------------------------|
| Decreased mortality  | Effective                     | Effective                          |
| Equivalent mortality | Effective                     | Not effective                      |
| Increased mortality  | Not effective / harmful       | Not effective / harmful            |

**Sample size**

The sample size calculation is based on two co-primary outcomes [29] :

1. 28-day mortality, for which we want to show non-inferiority of the PCT guided assessment as compared to current standard practice, using an absolute 2.5% non-inferiority margin. Assuming a 28-day mortality of 15% in patients managed as suspected sepsis treated in the ED [3 30], this means that any increase in 28-day mortality from 15% to not more than 17.5% would be considered non-inferior. For 90% power and one-sided 5% significance level the sample size required is 7002, assuming there is no difference in 28-day mortality between arms. Our patient focus group were also consulted on the 2.5% non-inferiority margin and felt that this was acceptable if there were mechanisms to monitor trial outcomes, and if this was what was needed to provide a sample size which would ensure the trial could be completed as well as answer the research question.
2. Initiation of antibiotics treatment, for which we want to show superiority. Currently around 90% of patients managed as suspected sepsis receive antibiotics (Liverpool University Hospitals NHS Foundation Trust, unpublished data). A reduction to 80% would be considered a success. To detect such an effect with 90% power and two-sided 5% significance level the sample size required is 532, which is substantially lower than what is needed for the non-inferiority endpoint. With 7002



1  
2  
3 patients we would be able to detect effects as small as a reduction from 90% to 87.6%, with 90%  
4 power.  
5  
6

7 Accounting for 5% dropout, we would need a total sample size of 7372. The group-sequential design  
8 with O'Brien-Fleming stopping boundaries for both effectiveness and futility/safety will increase the  
9 total maximum sample size (if the study is not stopped after the interim analysis) by just over 4% to  
10 7676 (inflated for 5% dropout).  
11

12 These sample sizes were calculated using SAS 9.4 PROC POWER and PROC SEQDESIGN.  
13  
14

### 15 16 **Interim analysis**

17 A planned interim analysis of the co-primary outcomes will be conducted when 50% of patients have  
18 been recruited and followed up for 28 days. Stopping the study shall be recommended by the  
19 Independent Data Monitoring Committee (IDMC) based on group-sequential O'Brien-Fleming  
20 boundaries. They shall recommend stopping for effectiveness if:  
21  
22

- 23 • the PCT guided assessment is superior in terms of 28-day mortality (i.e. a significant reduction to less  
24 than 15%), or
- 25 • the PCT guided assessment is non-inferior in terms of 28-day mortality and superior in terms of  
26 initiation of antibiotics.  
27

28 They shall recommend stopping for futility if the results of the interim analysis suggest futility for both  
29 endpoints. This strategy ensures overall type I error rate control [31 32]. The exact stopping rules will  
30 be specified in an interim analysis plan.  
31  
32

### 33 34 **Final analysis**

35 The primary analysis will be intention-to-treat and will fit separate two-level logistic regression models  
36 (patients nested within sites) to both co-primary outcomes (antibiotic initiation and mortality),  
37 controlling for baseline NEWS2 score (minimisation factor). The intervention will be considered  
38 effective if there is both a significant reduction in antibiotic initiation (two-sided 5% level) and if the  
39 difference in mortality between the two groups is non-inferior (one-sided 5% level). In case the 28-day  
40 mortality rate in the control arm deviates from the assumed 15%, the absolute 2.5% non-inferiority  
41 margin will be replaced with an arcsine difference 'non-inferiority frontier' [33]. The primary analysis  
42 will be adjusted to account for the group-sequential design. Imputation of missing data will be done as  
43 part of sensitivity analyses.  
44  
45

46 In a secondary analysis, complier adjusted causal effect models will be fitted to allow for non-adherence  
47 to the intervention. Two models will be fitted allowing for two different definitions of adherence:  
48  
49

- 50 1. Patients randomised to PCT guided care in whom a PCT test is done and the clinician considers  
51 the results as part of their decision making.
- 52 2. Patients randomised to PCT guided care in whom a PCT test is done and the clinician follows  
53 the algorithm exactly.  
54  
55

56 Analyses of secondary outcomes will also be performed as intention-to-treat and utilising appropriate  
57 two-level regression models depending on the type of outcome (e.g. linear regression for continuous  
58  
59  
60

1  
2  
3  
4 outcomes, Cox regression for time-to-event outcomes) to allow for patients nested within sites. This  
5 includes an HTA and economic evaluation as per CHEERS 2022 guidance. Analyses will be split by  
6 organ system of the infection (e.g. lower urinary tract, lower respiratory, intra-abdominal, bacteraemia,  
7 skin and soft tissue etc). Stratified analyses will be undertaken at different levels of NEWS2 scoring  $\leq$   
8 4, 5-6 and  $\geq 7$ , and will also be undertaken by COVID status. All further details will be specified in a  
9 statistical analysis plan which will be finalised prior to database lock for the planned interim analysis  
10 and subsequently published.  
11  
12  
13  
14  
15  
16  
17

18 Missing primary outcome data is likely to be minimal, so complete case analysis will be used. However,  
19 if this exceeds more than 20% of participants we will employ multiple imputation and report the impact  
20 on the treatment effect alongside the complete case analysis.  
21  
22

### 23 **Qualitative study**

24  
25 The qualitative work will have three components: interviews with clinicians, interviews with  
26 patients/carers, and observations of trial implementation (when appropriate during the ongoing current  
27 COVID-19 pandemic). Findings will be used to aid understanding of the quantitative data and provide  
28 areas for improvement in processes to enhance the efficiency of the trial.  
29  
30

31 Interviews with clinicians will take place at two time points. Interview 1 will take place during the pilot  
32 phase and will be a semi-structured interview with 10-12 clinicians at  $< 5$  study sites (2-3 per site). This  
33 will explore the feasibility and acceptability of research processes and integration of the PCT algorithm  
34 into their ED setting. Interview 2 will be with clinicians towards the end of the trial when they have  
35 more experience of using the PCT algorithm and will identify barriers and facilitators to the use  
36 of the PCT test and algorithm in more detail, including reasons for deviating from the study algorithm.  
37  
38  
39

40 We will conduct semi-structured interviews with patients after the 90 day follow-up, in order to gain a  
41 detailed understanding of patients' experiences of care to aid understanding of trial results. We will  
42 encourage patients to include a close family member in the interview also. This will allow us to capture  
43 an additional perspective on the patients' care.  
44  
45

### 46 **Patient and public involvement**

47  
48 The proposal has benefited from multiple interactions with PPI groups to refine the research question  
49 and design. Author JC is a lay co-applicant/patient representative, who has co-produced and helped  
50 finalise the study design. As a co-applicant JC is a member of the Trial Management Group ensuring  
51 that all patient facing materials are presented in a suitable way. Her experience is invaluable throughout  
52 the project, including the promotion of the trial to potential participants and appropriate dissemination  
53 of findings to the lay public.  
54  
55  
56

57 In addition, we have convened wider PPI advisory panels from both higher education institutions and  
58 NHS patient groups. We discussed the trial with the panel at the Royal Liverpool Hospital in August  
59 2018, focusing on need, conception, design and trial management. The group fully supported the need  
60

1  
2  
3 for this trial recognising the potential for PCT measurement to improve outcomes for patients with  
4 suspected sepsis and supported the use of deferred consent. Specific feedback about these aspects has  
5 now been used to update the relevant parts of the proposal.  
6  
7  
8

## 9 **Trial management**

10  
11 The trial is sponsored by the University of Liverpool and coordinated by Cardiff University CTR.  
12

### 13 **Trial Management Group**

14  
15  
16 The Trial Management Group (TMG) will meet monthly throughout the course of the trial and will  
17 include the Co-chief Investigators, co-applicants, collaborators, trial manager, data manager and  
18 administrator. TMG members will be required to sign up to the remit and conditions as set out in the  
19 TMG Charter.  
20  
21

### 22 **Trial Steering Committee and Independent Data Monitoring Committee**

23  
24  
25 An independent Trial Steering Committee (TSC) consisting of an independent chairperson, two  
26 independent members and a patient representative will provide oversight of the PRONTO trial. There  
27 will also be a separate Independent Data Monitoring Committee (IDMC) to provide oversight of all  
28 matters relating to patient safety and data quality, and recommend continuing or stopping the trial  
29 depending on the results of the interim analysis. Members will be required to sign up to the remit and  
30 conditions as set out in the TSC and IDMC charters and will meet at least annually.  
31  
32

## 33 **ETHICS AND DISSEMINATION**

### 34 **Ethics approvals and consent**

35  
36  
37 The trial was approved by the NHS Research Ethics Committee (Wales REC 2, reference 20/WA/0058)  
38 on the 21st July 2020 and subsequent HRA and Health and Care Research Wales approval was granted  
39 on 22<sup>nd</sup> July 2020. In England and Wales, the law allows the use of deferred consent in approved  
40 research situations (including emergency department studies) where the time dependent nature of  
41 intervention would not allow true informed consent to be obtained. PRONTO has approval for a  
42 deferred consent process to be used, full details are in Informed Consent section above. The following  
43 substantial amendments were made to the trial and were communicated to all trial sites: Amendment 5  
44 (23<sup>rd</sup> October 2020); Amendment 7 (10<sup>th</sup> December 2020); Amendment 9 (25<sup>th</sup> February 2021);  
45 Amendment 12 (29<sup>th</sup> June 2021), Amendment 15 (15<sup>th</sup> October 2021), Amendment 17 (6<sup>th</sup> January  
46 2022).  
47  
48

49  
50 The study has the following registration number: ISRCTN54006056.  
51  
52

### 53 **Dissemination plan**

We will engage with patient groups and the wider public through relevant charities such as UK Sepsis Trust and Antibiotics Action, and seek to present trial updates at their annual conferences. We will use press releases and social media outlets to publicise the trial and disseminate findings. A 90 second animation outlining the PRONTO main aims was commissioned <https://www.youtube.com/watch?v=H3x-rNVlwJI> [34] and accessed via posters and patient information leaflets via a scannable QR code. At the end of the trial, a final report will be prepared for the National Institute of Health Research Health Technology Assessment (NIHR HTA) Journal series. The results will be disseminated locally, nationally and internationally amongst scientific, clinical and lay groups including participants and their families. All publications and presentations related to the trial will be authorised by the TMG in accordance with the PRONTO publication policy. Where appropriate, the results of this trial can be directly implemented in the revisions of the NICE guidelines.

\*\*\* \*\*

### **Acknowledgments**

In addition to the authors, the PRONTO team comprises Sam Clarkstone, Jacqui Hughes and Lena Meister. The authors would like to pay special thanks to Principal Investigators Dr Andrew Tabner (Royal Derby Hospital) and Dr Gavin Barlow (Hull Royal Infirmary) for their input and constructive feedback at PRONTO TMG meetings. The authors would like to thank the research nurses and clinicians for their support during the trial. They would also like to acknowledge the contribution of the TSC members, namely Professor Timothy Peto, Professor Richard Body, Mike Bradburn, Professor Jane Daniels, Emma Richards and Angela Brain. The authors would also like to acknowledge the contribution of the IDMC members, namely Professor Sarah Walker, Professor Steve Goodacre, Dr Matthew Scarborough, Sian O'Shea and Claire James.

### **Contributors**

NF and ST are co-Chief-Investigators of this trial. NF and ST, along with ET-J, EDC, LB-H, PH, MI-K, MJL, FM, LN, EN, PP, PS, DT-R, IW and KH led the development of the research question, study design, obtaining the funding and implementation of the protocol. JE is the Trial Manager and ET-J is the senior trial manager who coordinate the operational delivery of the trial protocol and recruitment. LB-H is the lead qualitative researcher. PP is the trial statistician. SG is the data manager. All authors listed provided critical review and final approval of the manuscript.

### **Funding**

This trial is funded by the National Institute of Health Research Health Technology Assessment (NIHR HTA) programme, funder reference 17/136/13. The Centre for Trials Research at Cardiff University receives infrastructure funding from Health and Care Research Wales. The study is supported by the NIHR Clinical Research Network.

### **Sponsor**

PRONTO is sponsored by University of Liverpool. Sponsor@Liverpool.ac.uk, Sponsor reference: UoL001520.

## Competing interests

EDC is co-CI for the BATCH Trial (HTA 15/188/42) and the PEACH study (HTA Project: NIHR132254) on PCT use, and member of NICE Diagnostic advisory committee (2014–2020), and NICE Sepsis guideline development committee (2014–6). All other authors declare no competing interests.

## Disclaimer

The views expressed are those of the authors and not necessarily those of the NHS, the NIHR or the Department of Health and Social Care. Neither the Sponsor nor the Funder had any role in the study design; collection, management, analysis and interpretation of data; writing of this manuscript or in the decision to submit this manuscript for publication. ThermoFisher are not funding the study, and have no influence on the design, conduct or reporting of the study

## Consent for publication

Not applicable.

## Data availability statement

Not applicable at the time of protocol publication. Data available on request following publication of trial results.

## References

1. Singer M, Deutschman CS, Seymour CW, et al. The Third International Consensus Definitions for Sepsis and Septic Shock (Sepsis-3). *JAMA* 2016;**315**(8):801-10 doi: 10.1001/jama.2016.0287[published Online First: Epub Date].
2. NICE Sepsis Guide Development Group. Sepsis: recognition, diagnosis and early management , NICE guideline [NG51]. Last Update. [www.nice.org.uk/guidance/ng51](http://www.nice.org.uk/guidance/ng51).
3. Corfield AR, Lees F, Zealley I, et al. Utility of a single early warning score in patients with sepsis in the emergency department. *Emerg Med J* 2014;**31**(6):482-7 doi: 10.1136/emmermed-2012-202186[published Online First: Epub Date].
4. Burston J, Adhikari S, Hayen A, et al. A Role for Antimicrobial Stewardship in Clinical Sepsis Pathways: a Prospective Interventional Study. *Infect Control Hosp Epidemiol* 2017;**38**(9):1032-38 doi: 10.1017/ice.2017.139[published Online First: Epub Date].
5. Singer M, Inada-Kim M, Shankar-Hari M. Sepsis hysteria: excess hype and unrealistic expectations. *Lancet* 2019;**394**(10208):1513-14 doi: 10.1016/S0140-6736(19)32483-3[published Online First: Epub Date].
6. Klein Klouwenberg PM, Cremer OL, van Vught LA, et al. Likelihood of infection in patients with presumed sepsis at the time of intensive care unit admission: a cohort study. *Crit Care* 2015;**19**:319 doi: 10.1186/s13054-015-1035-1[published Online First: Epub Date].

- 1  
2  
3  
4 7. O'Neill J. Tackling drug-resistant infections globally: final report and recommendations. The  
5 review on antimicrobial resistance. London, 2016.
- 6  
7 8. Goodacre S, Thomas B, Lee E, et al. Characterisation of 22445 patients attending UK emergency  
8 departments with suspected COVID-19 infection: Observational cohort study. PLoS One  
9 2020;**15**(11):e0240206 doi: 10.1371/journal.pone.0240206[published Online First: Epub  
10 Date]].
- 11  
12 9. Schuetz P, Wirz Y, Sager R, et al. Effect of procalcitonin-guided antibiotic treatment on mortality  
13 in acute respiratory infections: a patient level meta-analysis. Lancet Infect Dis 2018;**18**(1):95-  
14 107 doi: 10.1016/S1473-3099(17)30592-3[published Online First: Epub Date]].
- 15  
16 10. Ou M, Zhu J, Ji P, et al. Risk factors of severe cases with COVID-19: a meta-analysis. Epidemiol  
17 Infect 2020;**148**:e175 doi: 10.1017/S095026882000179X[published Online First: Epub  
18 Date]].
- 19  
20 11. Tjendra Y, Al Mana AF, Espejo AP, et al. Predicting Disease Severity and Outcome in COVID-19  
21 Patients: A Review of Multiple Biomarkers. Arch Pathol Lab Med 2020;**144**(12):1465-74 doi:  
22 10.5858/arpa.2020-0471-SA[published Online First: Epub Date]].
- 23  
24 12. Physicians RCo. National Early Warning Score (NEWS) 2. Last Update December 2017.  
25 <https://www.rcplondon.ac.uk/projects/outputs/national-early-warning-score-news-2>.
- 26  
27 13. Graham CA, Hung KKC, Leung LY, Lo RSL. QSOFA, SIRS and NEWS2 to Predict 60-Day  
28 Mortality in the Emergency Department: Prospective Study. American Journal of Respiratory  
29 and Critical Care Medicine 2019
- 30  
31 14. Mellhammar L, Linder A, Tverring J, et al. NEWS2 is Superior to qSOFA in Detecting Sepsis  
32 with Organ Dysfunction in the Emergency Department. J Clin Med 2019;**8**(8) doi:  
33 10.3390/jcm8081128[published Online First: Epub Date]].
- 34  
35 15. Churpek MM, Snyder A, Han X, et al. Quick Sepsis-related Organ Failure Assessment, Systemic  
36 Inflammatory Response Syndrome, and Early Warning Scores for Detecting Clinical  
37 Deterioration in Infected Patients outside the Intensive Care Unit. Am J Respir Crit Care Med  
38 2017;**195**(7):906-11 doi: 10.1164/rccm.201604-0854OC[published Online First: Epub Date]].
- 39  
40 16. Redfern OC, Smith GB, Prytherch DR, Meredith P, Inada-Kim M, Schmidt PE. A Comparison of  
41 the Quick Sequential (Sepsis-Related) Organ Failure Assessment Score and the National  
42 Early Warning Score in Non-ICU Patients With/Without Infection. Crit Care Med  
43 2018;**46**(12):1923-33 doi: 10.1097/CCM.0000000000003359[published Online First: Epub  
44 Date]].
- 45  
46 17. Evans L, Rhodes A, Alhazzani W, et al. Surviving Sepsis Campaign: International Guidelines for  
47 Management of Sepsis and Septic Shock 2021. Critical Care Medicine 2021;**49**(11)
- 48  
49 18. Sze S, Pan D, Williams CML, et al. Letter to the Editor: Variability but not admission or trends in  
50 NEWS2 score predicts clinical outcome in elderly hospitalised patients with COVID-19. J  
51 Infect 2021;**82**(1):159-98 doi: 10.1016/j.jinf.2020.05.063[published Online First: Epub Date]].
- 52  
53  
54  
55  
56  
57  
58  
59  
60

19. Langford BJ, So M, Raybardhan S, et al. Bacterial co-infection and secondary infection in patients with COVID-19: a living rapid review and meta-analysis. *Clin Microbiol Infect* 2020;**26**(12):1622-29 doi: 10.1016/j.cmi.2020.07.016[published Online First: Epub Date].
20. Docherty AB, Harrison EM, Green CA, et al. Features of 20 133 UK patients in hospital with covid-19 using the ISARIC WHO Clinical Characterisation Protocol: prospective observational cohort study. *BMJ* 2020;**369**:m1985 doi: 10.1136/bmj.m1985[published Online First: Epub Date].
21. Myrstad M, Ihle-Hansen H, Tveita AA, et al. National Early Warning Score 2 (NEWS2) on admission predicts severe disease and in-hospital mortality from Covid-19 - a prospective cohort study. *Scand J Trauma Resusc Emerg Med* 2020;**28**(1):66 doi: 10.1186/s13049-020-00764-3[published Online First: Epub Date].
22. NICE. Procalcitonin testing for diagnosing and monitoring sepsis (ADVIA Centaur BRAHMS PCT assay, BRAHMS PCT Sensitive Kryptor assay, Elecsys BRAHMS PCT assay, LIAISON BRAHMS PCT assay and VIDAS BRAHMS PCT assay): Diagnostic Guidance [DG18]. 2015
23. Westwood M, Ramaekers B, Whiting P, et al. Procalcitonin testing to guide antibiotic therapy for the treatment of sepsis in intensive care settings and for suspected bacterial infection in emergency department settings: a systematic review and cost-effectiveness analysis. *Health Technol Assess* 2015;**19**(96):v-xxv, 1-236 doi: 10.3310/hta19960[published Online First: Epub Date].
24. Richards O, Pallmann P, King C, et al. Procalcitonin Increase Is Associated with the Development of Critical Care-Acquired Infections in COVID-19 ARDS. *Antibiotics (Basel)* 2021;**10**(11) doi: 10.3390/antibiotics10111425[published Online First: Epub Date].
25. Kamat IS, Ramachandran V, Eswaran H, Guffey D, Musher DM. Procalcitonin to Distinguish Viral From Bacterial Pneumonia: A Systematic Review and Meta-analysis. *Clinical Infectious Diseases* 2019;**70**(3):538-42 doi: 10.1093/cid/ciz545[published Online First: Epub Date].
26. Altman DG, Bland JM. Treatment allocation by minimisation. *BMJ* 2005;**330**(7495):843 doi: 10.1136/bmj.330.7495.843[published Online First: Epub Date].
27. NIHR. Sepsis: Quality standard [QS161]. Last Update. <https://www.nice.org.uk/guidance/qs161>.
28. Medicines For Human Use (Clinical Trials) Amendment Regulations (SI 2006/1928), 2006.
29. Gillespie D, Francis NA, Carrol ED, Thomas-Jones E, Butler CC, Hood K. Use of co-primary outcomes for trials of antimicrobial stewardship interventions. *Lancet Infect Dis* 2018;**18**(6):595-97 doi: 10.1016/S1473-3099(18)30289-5[published Online First: Epub Date].
30. Goulden R, Hoyle MC, Monis J, et al. qSOFA, SIRS and NEWS for predicting inhospital mortality and ICU admission in emergency admissions treated as sepsis. *Emerg Med J* 2018;**35**(6):345-49 doi: 10.1136/emered-2017-207120[published Online First: Epub Date].

- 1  
2  
3  
4 31. Hamasaki T, Asakura K, Evans SR, Sugimoto T, Sozu T. Group-Sequential Strategies in Clinical  
5 Trials with Multiple Co-Primary Outcomes. *Stat Biopharm Res* 2015;**7**(1):36-54 doi:  
6 10.1080/19466315.2014.1003090[published Online First: Epub Date].  
7  
8 32. Flight L, Julious SA. Practical guide to sample size calculations: non-inferiority and equivalence  
9 trials. *Pharm Stat* 2016;**15**(1):80-9 doi: 10.1002/pst.1716[published Online First: Epub Date].  
10  
11 33. Quartagno M, Walker AS, Babiker AG, et al. Handling an uncertain control group event risk in  
12 non-inferiority trials: non-inferiority frontiers and the power-stabilising transformation. *Trials*  
13 2020;**21**(1):145 doi: 10.1186/s13063-020-4070-4[published Online First: Epub Date].  
14  
15 34. Animated S. Optimising antibiotic use in sepsis: PRONTO Trial. Last Update.  
16 <https://www.youtube.com/watch?v=H3x-rNVlwJI>.  
17  
18

## 19 **FIGURE TITLES**

### 20 **Figure 1. Trial schema**

### 21 **Figure 2. Consent procedures**



1  
2  
3  
4  
5  
6  
7  
8  
9  
10  
11  
12  
13  
14  
15  
16  
17  
18  
19  
20  
21  
22  
23  
24  
25  
26  
27  
28  
29  
30  
31  
32  
33  
34  
35  
36  
37  
38  
39  
40  
41  
42  
43  
44  
45  
46  
47  
48  
49  
50  
51  
52  
53  
54  
55  
56  
57  
58  
59  
60



1  
2  
3  
4  
5  
6  
7  
8  
9  
10  
11  
12  
13  
14  
15  
16  
17  
18  
19  
20  
21  
22  
23  
24  
25  
26  
27  
28  
29  
30  
31  
32  
33  
34  
35  
36  
37  
38  
39  
40  
41  
42  
43  
44  
45  
46

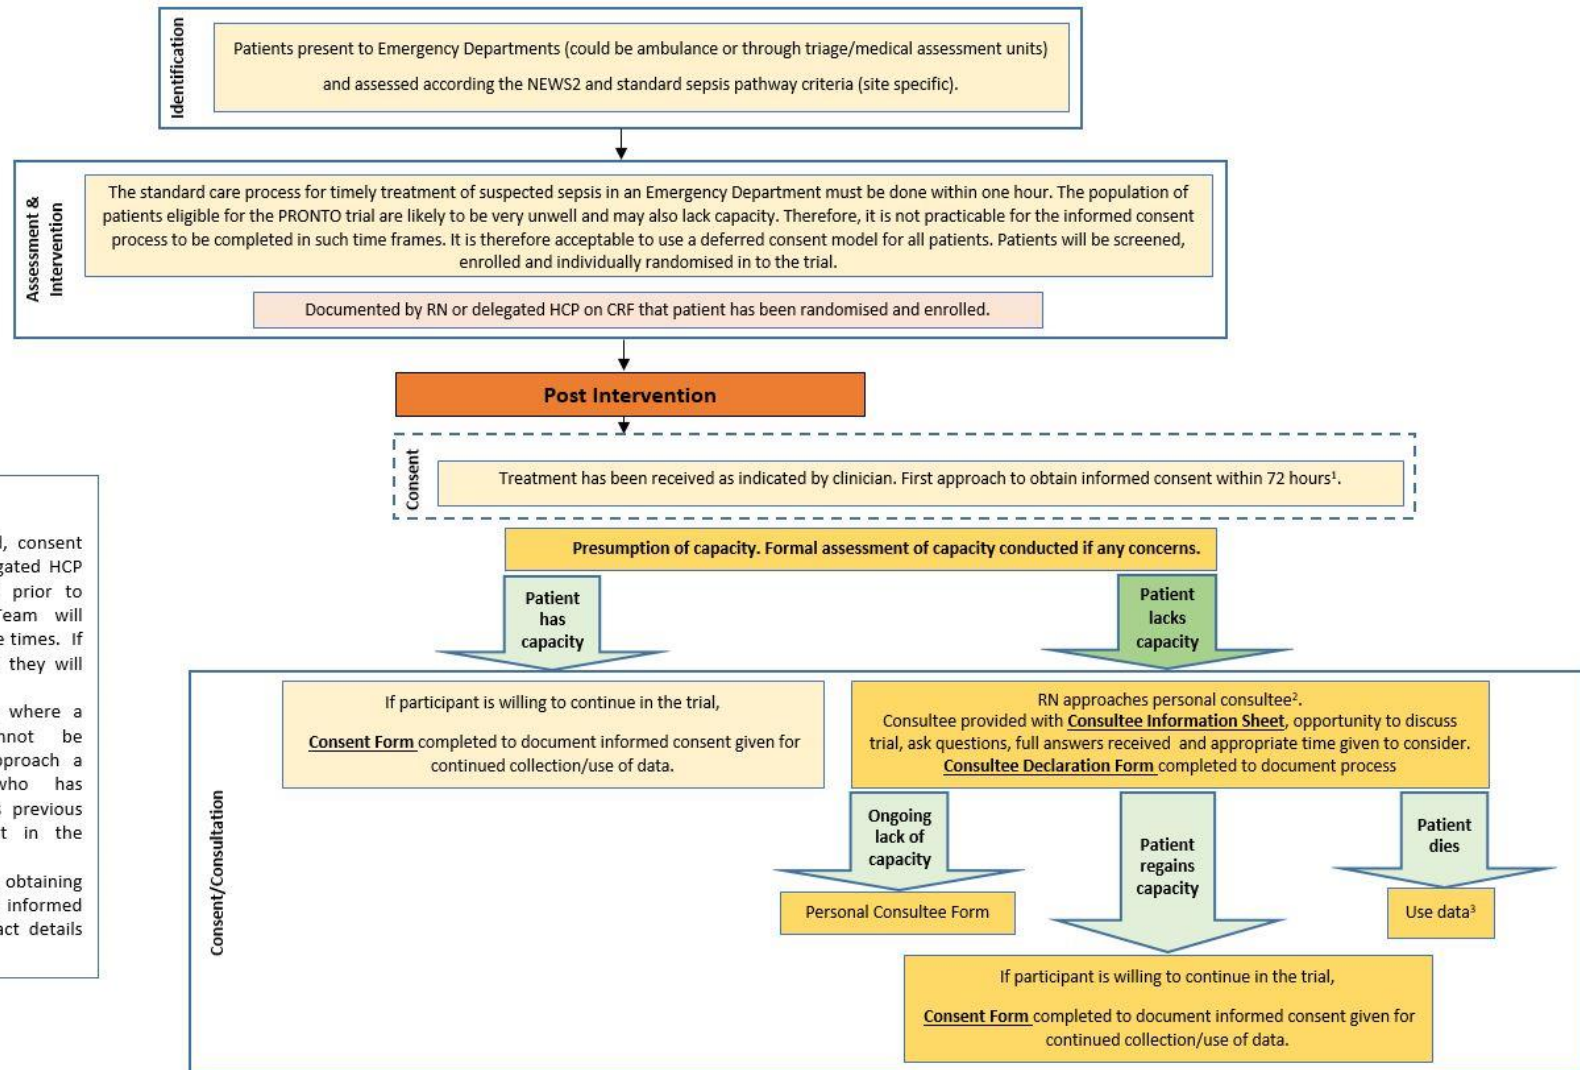

**Footnotes**

1. If participant is discharged, consent obtained as detailed. Delegated HCP to try to obtain consent prior to discharge or Research Team will attempt contact up to three times. If patient is not contactable, they will be removed from study.
2. In extreme circumstances where a personal consultee cannot be identified, ED staff to approach a nominated consultee who has knowledge of participant's previous care but no involvement in the PRONTO trial.
3. If a participant dies prior to obtaining consent, the family will be informed via letter with study contact details and further information.

1  
2  
3  
4 Protocol for PROcalcitonin and NEWS2 evaluation for Timely  
5 identification of sepsis and Optimal use of antibiotics in the emergency  
6 department (PRONTO): a multicentre open label randomised  
7 controlled trial  
8  
9  
10  
11  
12  
13

14 Supplementary File  
15  
16  
17

18 Supplementary table 1 – Tiered Consent Levels  
19

|                                                                                                                                                                                                                                                    |   |                                                                                                                                                                               |
|----------------------------------------------------------------------------------------------------------------------------------------------------------------------------------------------------------------------------------------------------|---|-------------------------------------------------------------------------------------------------------------------------------------------------------------------------------|
| 20<br>21<br>22<br>23<br>24<br>25<br>26<br>27<br>28<br>29<br>30<br>31<br>32<br>33<br>34<br>35<br>36<br>37<br>38<br>39<br>40<br>41<br>42<br>43<br>44<br>45<br>46<br>47<br>48<br>49<br>50<br>51<br>52<br>53<br>54<br>55<br>56<br>57<br>58<br>59<br>60 | 1 | Information collected as part of the trial and data from medical records up to this point can be used in the trial                                                            |
|                                                                                                                                                                                                                                                    | 2 | Data from records can be collected for the 90 days of the study                                                                                                               |
|                                                                                                                                                                                                                                                    | 3 | Participant or their consultee agree to be contacted at day 28 and day 90 to ask about health, wellbeing and any further medical treatment the participant may have received  |
|                                                                                                                                                                                                                                                    | 4 | Information collected as part of this trial can be used in other future studies which have been approved by appropriate NHS procedures (data linkage)                         |
|                                                                                                                                                                                                                                                    | 5 | Participant or their consultee agree to be invited to an interview about my health experiences, my views on treatment, and what it was like to take part in the PRONTO trial. |

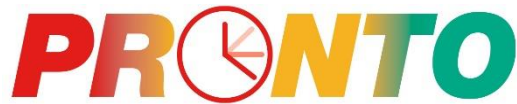

PROcalcitonin and NEWS2 evaluation for Timely identification of sepsis and  
Optimal use of antibiotics in the Emergency Department

Site ID

|  |  |  |
|--|--|--|
|  |  |  |
|--|--|--|

PID

|  |  |  |  |
|--|--|--|--|
|  |  |  |  |
|--|--|--|--|

## PARTICIPANT CONSENT FORM

Chief Investigator: Professor Neil French, University of Liverpool

(Please **initial** each statement and sign in full at the bottom of the page)

|    |                                                                                                                                                                                                                                                                                                                                                                                                                                                                                                                    |       |
|----|--------------------------------------------------------------------------------------------------------------------------------------------------------------------------------------------------------------------------------------------------------------------------------------------------------------------------------------------------------------------------------------------------------------------------------------------------------------------------------------------------------------------|-------|
| 1. | I confirm that I have read and understood the Patient Information Sheet (version 1.2, dated 08.10.2020) for the PRONTO trial. I have had the opportunity to consider the information, ask questions and have had these answered satisfactorily.                                                                                                                                                                                                                                                                    | _____ |
| 2. | I understand that I have already entered the trial but do not have to continue to take part. I understand that I can agree to take part in different parts of the trial and will indicate my choice below. I understand that I am free to withdraw my consent at any time, without giving any reason, without my normal medical care or legal rights being affected.                                                                                                                                               | _____ |
| 3. | I understand the trial is randomised and no one has picked which treatment I received. I understand that I was randomised to have either an additional procalcitonin test or standard care. If I was allocated to the treatment arm of the trial, procalcitonin levels in my blood were tested as part of routine blood tests or via an additional finger prick in the absence of routine blood collection. I consent to the data generated from the procalcitonin test to be used for the purposes of this trial. | _____ |
| 4. | I understand that information collected during the trial can be used by the study team to look at treatment of sepsis in patients presenting to the emergency department.                                                                                                                                                                                                                                                                                                                                          | _____ |
| 5. | I understand that information collected about me that is held and maintained by NHS Digital and other central UK NHS bodies, may be collected from my medical records and other health-related records and looked at by the research team and responsible practitioners during the trial.                                                                                                                                                                                                                          | _____ |
| 6. | I understand that information collected about me (including name and address) will be held at the Centre for Trials Research, Cardiff University according to the 2018 General Data Protection Regulation (GDPR) (EU 2016/679). I understand that this information will be kept strictly confidential and that no personal information will be used in the study report or publications.                                                                                                                           | _____ |
| 7. | I agree to continue to take part in the trial.<br><br><b>Please select which aspects you agree to take part in:</b>                                                                                                                                                                                                                                                                                                                                                                                                | _____ |
| 8. | I agree that information collected as part of the trial and data from my medical records up to this point can be used in the trial.                                                                                                                                                                                                                                                                                                                                                                                | _____ |
| 9. | I agree that data from my records can be collected for the 90 days of the study                                                                                                                                                                                                                                                                                                                                                                                                                                    | _____ |

|     |                                                                                                                                                                                                                                                                                                        |  |
|-----|--------------------------------------------------------------------------------------------------------------------------------------------------------------------------------------------------------------------------------------------------------------------------------------------------------|--|
| 10  | I agree to be contacted at day 28 and day 90 to ask about my health, wellbeing and any further medical treatment I may have received. I give my consent for a member of the research team to contact me by the following methods to complete these surveys:<br><br>Telephone<br><br>Email<br><br>Post. |  |
| 11  | I agree that the information collected as part of this trial can be used in other future studies which have been approved by appropriate NHS procedures (data linkage)                                                                                                                                 |  |
| 12. | I agree to be invited to an interview about my health experiences, my views on treatment, and what it was like to take part in the PRONTO trial.                                                                                                                                                       |  |

Name of Participant: \_\_\_\_\_

Signed: \_\_\_\_\_ Date: \_\_/\_\_/\_\_

Name of Person taking consent \_\_\_\_\_

Signed: \_\_\_\_\_ Date: \_\_/\_\_/\_\_

Supplementary Table 2: Outcome data collection

| Outcome                                            | Data Source                                                   | Type of data                                    | Frequency         | By Whom                                                                     |
|----------------------------------------------------|---------------------------------------------------------------|-------------------------------------------------|-------------------|-----------------------------------------------------------------------------|
| Antibiotic (Abx) initiation                        | Observation (Obs) charts/medical notes/drug charts            | Time of initiation, Abx type, dose, duration    | Admission/Daily   | Research Nurse                                                              |
| Abx use (IV and Oral) in-patient                   | Obs charts/medical notes/drug charts                          | Abx type, dose, duration                        | Daily             | Research Nurse                                                              |
| Abx use (IV and Oral) post discharge up to 28 days | Obs charts/medical notes/drug charts/patient report/GP record | Abx type, dose, duration                        | At 28 day         | Research Nurse                                                              |
| Adverse events                                     | Obs charts/medical notes                                      | Date, type                                      | Daily             | Research Nurse                                                              |
| ICU usage                                          | Medical notes                                                 | Date, details of admission to ICU               | Daily             | Research Nurse                                                              |
| Unscheduled readmissions                           | Medical notes                                                 | ICU re-admissions, re-admissions post discharge | Daily             | Research Nurse                                                              |
| Mortality                                          | Medical notes                                                 | Date, Description                               | If before Day 90  | Research Nurse                                                              |
| Discharge                                          | Medical notes                                                 | Date, Description                               | If before Day 28  | Research Nurse                                                              |
| Serious Adverse Drug Reactions (ADRs)              | Medical notes                                                 | ADR(s)                                          | Daily             | Research Nurse                                                              |
| Health utility                                     | Patient reported                                              | -                                               | Day 28 and Day 90 | EQ-5D/5L, Patient reported questionnaire, collected by telephone or by post |
| Health-related Quality of Life (EQ-5D/5L)          | Patient reported                                              | -                                               | Day 28 and Day 90 | Patient reported, collected by telephone, or by post                        |
| Resource use                                       | Patient reported                                              | Direct medical costs and resource use           | Day 28 and Day 90 | Patient reported, collected by telephone, or by post                        |

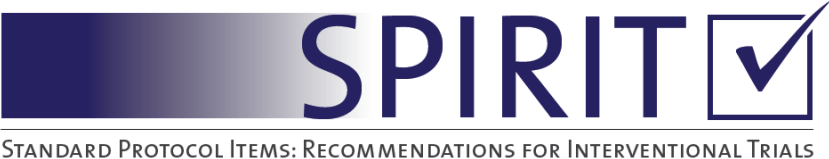

1  
2  
3  
4  
5  
6  
7  
8  
9  
10  
11  
12  
13  
14  
15  
16  
17  
18  
19  
20  
21  
22  
23  
24  
25  
26  
27  
28  
29  
30  
31  
32  
33  
34  
35  
36  
37  
38  
39  
40  
41  
42  
43  
44  
45  
46

SPIRIT 2013 Checklist: Recommended items to address in a clinical trial protocol and related documents\*

| Section/item                      | Item No | Description                                                                                                                                                                                                                                                                              | Addressed on page number |
|-----------------------------------|---------|------------------------------------------------------------------------------------------------------------------------------------------------------------------------------------------------------------------------------------------------------------------------------------------|--------------------------|
| <b>Administrative information</b> |         |                                                                                                                                                                                                                                                                                          |                          |
| Title                             | 1       | Descriptive title identifying the study design, population, interventions, and, if applicable, trial acronym                                                                                                                                                                             | ___ 1 ___                |
| Trial registration                | 2a      | Trial identifier and registry name. If not yet registered, name of intended registry                                                                                                                                                                                                     | ___ 2 ___                |
|                                   | 2b      | All items from the World Health Organization Trial Registration Data Set                                                                                                                                                                                                                 | ___ n/a ___              |
| Protocol version                  | 3       | Date and version identifier                                                                                                                                                                                                                                                              | ___ 3 ___                |
| Funding                           | 4       | Sources and types of financial, material, and other support                                                                                                                                                                                                                              | ___ 13 ___               |
| Roles and responsibilities        | 5a      | Names, affiliations, and roles of protocol contributors                                                                                                                                                                                                                                  | ___ 13 ___               |
|                                   | 5b      | Name and contact information for the trial sponsor                                                                                                                                                                                                                                       | ___ 13 ___               |
|                                   | 5c      | Role of study sponsor and funders, if any, in study design; collection, management, analysis, and interpretation of data; writing of the report; and the decision to submit the report for publication, including whether they will have ultimate authority over any of these activities | ___ 13 ___               |
|                                   | 5d      | Composition, roles, and responsibilities of the coordinating centre, steering committee, endpoint adjudication committee, data management team, and other individuals or groups overseeing the trial, if applicable (see Item 21a for data monitoring committee)                         | ___ 11, 12, ___          |

1 **Introduction**

2

3 Background and rationale 6a Description of research question and justification for undertaking the trial, including summary of relevant studies (published and unpublished) examining benefits and harms for each intervention \_\_\_\_\_ 3 \_\_\_\_\_

4

5

6 6b Explanation for choice of comparators 3,4, 8, 10

7

8 Objectives 7 Specific objectives or hypotheses \_\_\_\_\_ 4 \_\_\_\_\_

9

10 Trial design 8 Description of trial design including type of trial (eg, parallel group, crossover, factorial, single group), allocation ratio, and framework (eg, superiority, equivalence, noninferiority, exploratory) \_\_\_\_\_ 4 \_\_\_\_\_

11

12

13

14 **Methods: Participants, interventions, and outcomes**

15

16 Study setting 9 Description of study settings (eg, community clinic, academic hospital) and list of countries where data will be collected. Reference to where list of study sites can be obtained \_\_\_\_\_ 4 \_\_\_\_\_

17

18

19 Eligibility criteria 10 Inclusion and exclusion criteria for participants. If applicable, eligibility criteria for study centres and individuals who will perform the interventions (eg, surgeons, psychotherapists) \_\_\_\_\_ 5 \_\_\_\_\_

20

21

22 Interventions 11a Interventions for each group with sufficient detail to allow replication, including how and when they will be administered \_\_\_\_\_ 6-7 \_\_\_\_\_

23

24

25 11b Criteria for discontinuing or modifying allocated interventions for a given trial participant (eg, drug dose change in response to harms, participant request, or improving/worsening disease) \_\_\_\_\_ 9, 10 \_\_\_\_\_

26

27

28 11c Strategies to improve adherence to intervention protocols, and any procedures for monitoring adherence (eg, drug tablet return, laboratory tests) \_\_\_ 4,7,9,10, \_\_\_

29

30

31 11d Relevant concomitant care and interventions that are permitted or prohibited during the trial \_\_\_\_\_ 4,5 \_\_\_\_\_

32

33

34 Outcomes 12 Primary, secondary, and other outcomes, including the specific measurement variable (eg, systolic blood pressure), analysis metric (eg, change from baseline, final value, time to event), method of aggregation (eg, median, proportion), and time point for each outcome. Explanation of the clinical relevance of chosen efficacy and harm outcomes is strongly recommended \_\_\_ 8,9 & sup mat \_\_\_\_\_

35

36

37

38

39

40 Participant timeline 13 Time schedule of enrolment, interventions (including any run-ins and washouts), assessments, and visits for participants. A schematic diagram is highly recommended (see Figure) \_\_\_ 5,6,7 (see Figures 1 and 2) \_\_\_\_\_

41

42

43

44

45

46



1 Sample size 14 Estimated number of participants needed to achieve study objectives and how it was determined, including \_\_\_\_\_9-10\_\_\_\_\_

2 clinical and statistical assumptions supporting any sample size calculations

3

4 Recruitment 15 Strategies for achieving adequate participant enrolment to reach target sample size \_\_\_\_\_4, 10\_\_\_\_\_

5

6 **Methods: Assignment of interventions (for controlled trials)**

7

8 Allocation:

9

10 Sequence 16a Method of generating the allocation sequence (eg, computer-generated random numbers), and list of any \_\_\_\_\_ 5\_\_\_\_\_

11 generation factors for stratification. To reduce predictability of a random sequence, details of any planned restriction

12 (eg, blocking) should be provided in a separate document that is unavailable to those who enrol participants

13 or assign interventions

14

15

16 Allocation 16b Mechanism of implementing the allocation sequence (eg, central telephone; sequentially numbered, \_\_\_\_\_ 5\_\_\_\_\_

17 concealment opaque, sealed envelopes), describing any steps to conceal the sequence until interventions are assigned

18 mechanism

19

20 Implementation 16c Who will generate the allocation sequence, who will enrol participants, and who will assign participants to \_\_\_\_\_ 5\_\_\_\_\_

21 interventions

22

23

24 Blinding (masking) 17a Who will be blinded after assignment to interventions (eg, trial participants, care providers, outcome \_\_\_\_\_ n/a open label trial

25 assessors, data analysts), and how

26

27 17b If blinded, circumstances under which unblinding is permissible, and procedure for revealing a participant's \_\_\_\_\_ n/a\_\_\_\_\_

28 allocated intervention during the trial

29

30

31 **Methods: Data collection, management, and analysis**

32

33 Data collection 18a Plans for assessment and collection of outcome, baseline, and other trial data, including any related \_\_\_\_\_ 7, 8\_\_\_\_\_

34 methods processes to promote data quality (eg, duplicate measurements, training of assessors) and a description of

35 study instruments (eg, questionnaires, laboratory tests) along with their reliability and validity, if known.

36 Reference to where data collection forms can be found, if not in the protocol

37

38

39 18b Plans to promote participant retention and complete follow-up, including list of any outcome data to be \_\_\_\_\_ 7-9\_\_\_\_\_

40 collected for participants who discontinue or deviate from intervention protocols

41

42

|    |                                 |     |                                                                                                                                                                                                                                                                                                                                       |               |
|----|---------------------------------|-----|---------------------------------------------------------------------------------------------------------------------------------------------------------------------------------------------------------------------------------------------------------------------------------------------------------------------------------------|---------------|
| 1  | Data management                 | 19  | Plans for data entry, coding, security, and storage, including any related processes to promote data quality (eg, double data entry; range checks for data values). Reference to where details of data management procedures can be found, if not in the protocol                                                                     | ___ 7, 8, ___ |
| 2  |                                 |     |                                                                                                                                                                                                                                                                                                                                       |               |
| 3  |                                 |     |                                                                                                                                                                                                                                                                                                                                       |               |
| 4  |                                 |     |                                                                                                                                                                                                                                                                                                                                       |               |
| 5  | Statistical methods             | 20a | Statistical methods for analysing primary and secondary outcomes. Reference to where other details of the statistical analysis plan can be found, if not in the protocol                                                                                                                                                              | ___ 8 - 10___ |
| 6  |                                 |     |                                                                                                                                                                                                                                                                                                                                       |               |
| 7  |                                 |     |                                                                                                                                                                                                                                                                                                                                       |               |
| 8  |                                 | 20b | Methods for any additional analyses (eg, subgroup and adjusted analyses)                                                                                                                                                                                                                                                              | ___ 10_____   |
| 9  |                                 |     |                                                                                                                                                                                                                                                                                                                                       |               |
| 10 |                                 | 20c | Definition of analysis population relating to protocol non-adherence (eg, as randomised analysis), and any statistical methods to handle missing data (eg, multiple imputation)                                                                                                                                                       | ___10_____    |
| 11 |                                 |     |                                                                                                                                                                                                                                                                                                                                       |               |
| 12 |                                 |     |                                                                                                                                                                                                                                                                                                                                       |               |
| 13 |                                 |     |                                                                                                                                                                                                                                                                                                                                       |               |
| 14 | <b>Methods: Monitoring</b>      |     |                                                                                                                                                                                                                                                                                                                                       |               |
| 15 |                                 |     |                                                                                                                                                                                                                                                                                                                                       |               |
| 16 | Data monitoring                 | 21a | Composition of data monitoring committee (DMC); summary of its role and reporting structure; statement of whether it is independent from the sponsor and competing interests; and reference to where further details about its charter can be found, if not in the protocol. Alternatively, an explanation of why a DMC is not needed | ___ 12_____   |
| 17 |                                 |     |                                                                                                                                                                                                                                                                                                                                       |               |
| 18 |                                 |     |                                                                                                                                                                                                                                                                                                                                       |               |
| 19 |                                 |     |                                                                                                                                                                                                                                                                                                                                       |               |
| 20 |                                 |     |                                                                                                                                                                                                                                                                                                                                       |               |
| 21 |                                 |     |                                                                                                                                                                                                                                                                                                                                       |               |
| 22 |                                 | 21b | Description of any interim analyses and stopping guidelines, including who will have access to these interim results and make the final decision to terminate the trial                                                                                                                                                               | ___9-10_____  |
| 23 |                                 |     |                                                                                                                                                                                                                                                                                                                                       |               |
| 24 |                                 |     |                                                                                                                                                                                                                                                                                                                                       |               |
| 25 | Harms                           | 22  | Plans for collecting, assessing, reporting, and managing solicited and spontaneously reported adverse events and other unintended effects of trial interventions or trial conduct                                                                                                                                                     | ___ 8_____    |
| 26 |                                 |     |                                                                                                                                                                                                                                                                                                                                       |               |
| 27 |                                 |     |                                                                                                                                                                                                                                                                                                                                       |               |
| 28 | Auditing                        | 23  | Frequency and procedures for auditing trial conduct, if any, and whether the process will be independent from investigators and the sponsor                                                                                                                                                                                           | ___ 8_____    |
| 29 |                                 |     |                                                                                                                                                                                                                                                                                                                                       |               |
| 30 |                                 |     |                                                                                                                                                                                                                                                                                                                                       |               |
| 31 |                                 |     |                                                                                                                                                                                                                                                                                                                                       |               |
| 32 | <b>Ethics and dissemination</b> |     |                                                                                                                                                                                                                                                                                                                                       |               |
| 33 |                                 |     |                                                                                                                                                                                                                                                                                                                                       |               |
| 34 | Research ethics approval        | 24  | Plans for seeking research ethics committee/institutional review board (REC/IRB) approval                                                                                                                                                                                                                                             | ___ 12_____   |
| 35 |                                 |     |                                                                                                                                                                                                                                                                                                                                       |               |
| 36 |                                 |     |                                                                                                                                                                                                                                                                                                                                       |               |
| 37 | Protocol amendments             | 25  | Plans for communicating important protocol modifications (eg, changes to eligibility criteria, outcomes, analyses) to relevant parties (eg, investigators, REC/IRBs, trial participants, trial registries, journals, regulators)                                                                                                      | ___ 12_____   |
| 38 |                                 |     |                                                                                                                                                                                                                                                                                                                                       |               |
| 39 |                                 |     |                                                                                                                                                                                                                                                                                                                                       |               |
| 40 |                                 |     |                                                                                                                                                                                                                                                                                                                                       |               |
| 41 |                                 |     |                                                                                                                                                                                                                                                                                                                                       |               |
| 42 |                                 |     |                                                                                                                                                                                                                                                                                                                                       |               |

|    |                               |     |                                                                                                                                                                                                                                                                                     |                        |
|----|-------------------------------|-----|-------------------------------------------------------------------------------------------------------------------------------------------------------------------------------------------------------------------------------------------------------------------------------------|------------------------|
| 1  | Consent or assent             | 26a | Who will obtain informed consent or assent from potential trial participants or authorised surrogates, and how (see Item 32)                                                                                                                                                        | 6-7 and figure 2       |
| 2  |                               |     |                                                                                                                                                                                                                                                                                     |                        |
| 3  |                               |     |                                                                                                                                                                                                                                                                                     |                        |
| 4  |                               | 26b | Additional consent provisions for collection and use of participant data and biological specimens in ancillary studies, if applicable                                                                                                                                               | _____n/a_____          |
| 5  |                               |     |                                                                                                                                                                                                                                                                                     |                        |
| 6  |                               |     |                                                                                                                                                                                                                                                                                     |                        |
| 7  | Confidentiality               | 27  | How personal information about potential and enrolled participants will be collected, shared, and maintained in order to protect confidentiality before, during, and after the trial                                                                                                | _____7_____            |
| 8  |                               |     |                                                                                                                                                                                                                                                                                     |                        |
| 9  |                               |     |                                                                                                                                                                                                                                                                                     |                        |
| 10 | Declaration of interests      | 28  | Financial and other competing interests for principal investigators for the overall trial and each study site                                                                                                                                                                       | _____13_____           |
| 11 |                               |     |                                                                                                                                                                                                                                                                                     |                        |
| 12 |                               |     |                                                                                                                                                                                                                                                                                     |                        |
| 13 | Access to data                | 29  | Statement of who will have access to the final trial dataset, and disclosure of contractual agreements that limit such access for investigators                                                                                                                                     | _____13_____           |
| 14 |                               |     |                                                                                                                                                                                                                                                                                     |                        |
| 15 |                               |     |                                                                                                                                                                                                                                                                                     |                        |
| 16 |                               |     |                                                                                                                                                                                                                                                                                     |                        |
| 17 | Ancillary and post-trial care | 30  | Provisions, if any, for ancillary and post-trial care, and for compensation to those who suffer harm from trial participation                                                                                                                                                       | _____n/a_____          |
| 18 |                               |     |                                                                                                                                                                                                                                                                                     |                        |
| 19 |                               |     |                                                                                                                                                                                                                                                                                     |                        |
| 20 | Dissemination policy          | 31a | Plans for investigators and sponsor to communicate trial results to participants, healthcare professionals, the public, and other relevant groups (eg, via publication, reporting in results databases, or other data sharing arrangements), including any publication restrictions | _____12_____           |
| 21 |                               |     |                                                                                                                                                                                                                                                                                     |                        |
| 22 |                               |     |                                                                                                                                                                                                                                                                                     |                        |
| 23 |                               |     |                                                                                                                                                                                                                                                                                     |                        |
| 24 |                               | 31b | Authorship eligibility guidelines and any intended use of professional writers                                                                                                                                                                                                      | _____none_____         |
| 25 |                               |     |                                                                                                                                                                                                                                                                                     |                        |
| 26 |                               | 31c | Plans, if any, for granting public access to the full protocol, participant-level dataset, and statistical code                                                                                                                                                                     | _____none_____         |
| 27 |                               |     |                                                                                                                                                                                                                                                                                     |                        |
| 28 |                               |     |                                                                                                                                                                                                                                                                                     |                        |
| 29 | <b>Appendices</b>             |     |                                                                                                                                                                                                                                                                                     |                        |
| 30 |                               |     |                                                                                                                                                                                                                                                                                     |                        |
| 31 | Informed consent materials    | 32  | Model consent form and other related documentation given to participants and authorised surrogates                                                                                                                                                                                  | Supplementary appendix |
| 32 |                               |     |                                                                                                                                                                                                                                                                                     |                        |
| 33 |                               |     |                                                                                                                                                                                                                                                                                     |                        |
| 34 | Biological specimens          | 33  | Plans for collection, laboratory evaluation, and storage of biological specimens for genetic or molecular analysis in the current trial and for future use in ancillary studies, if applicable                                                                                      | _____none_____         |
| 35 |                               |     |                                                                                                                                                                                                                                                                                     |                        |
| 36 |                               |     |                                                                                                                                                                                                                                                                                     |                        |

37 \*It is strongly recommended that this checklist be read in conjunction with the SPIRIT 2013 Explanation & Elaboration for important clarification on the items.  
 38 Amendments to the protocol should be tracked and dated. The SPIRIT checklist is copyrighted by the SPIRIT Group under the Creative Commons  
 39 "[Attribution-NonCommercial-NoDerivs 3.0 Unported](#)" license.  
 40
