# Supplementary material for: PROcalcitonin and NEWS2 evaluation for Timely identification of sepsis and Optimal use of antibiotics in the emergency department (PRONTO): protocol for a multicentre, open-label, randomised controlled trial
Source: PubMed Central journal article supplement — BMJ Open. 2022 Jun 12;12(6):e063424. doi: 10.1136/bmjopen-2022-063424 (PMC9196199; doi:10.1136/bmjopen-2022-063424), 2022-06-12
Supplement: bmjopen-2022-063424.reviewer_comments.pdf [file bmjopen-2022-063424.reviewer_comments.pdf]

## PEER REVIEW HISTORY

BMJ Open publishes all reviews undertaken for accepted manuscripts. Reviewers are asked to complete a checklist review form (<http://bmjopen.bmj.com/site/about/resources/checklist.pdf>) and are provided with free text boxes to elaborate on their assessment. These free text comments are reproduced below.

## ARTICLE DETAILS

|                            |                                                                                                                                                                                                                                                                                                                                                                       |
|----------------------------|-----------------------------------------------------------------------------------------------------------------------------------------------------------------------------------------------------------------------------------------------------------------------------------------------------------------------------------------------------------------------|
| <b>TITLE (PROVISIONAL)</b> | PROcalcitonin and NEWS2 evaluation for Timely identification of sepsis and Optimal use of antibiotics in the emergency department (PRONTO): protocol for a multicentre, open label, randomised controlled trial                                                                                                                                                       |
| <b>AUTHORS</b>             | Euden, joanne; Thomas-Jones, Emma; Aston, Stephen; Brookes-Howell, Lucy; Carman, Julie; Carrol, Enitan; Gilbert, Stephanie; Howard, P; Hood, Kerenza; Inada-Kim, Matthew; Llewelyn, Martin; McGill, Fiona; Milosevic, Sarah; Niessen, Louis; Nsutebu, Emmanuel; Pallmann, Philip; Schmidt, Paul; Taylor-Robinson, David; Welters, Ingeborg; Todd, Stacy; French, Neil |

This article was not externally reviewed at BMJ Open. Protocols that have been independently assessed prior to submission to BMJ Open are usually fast-tracked to publication on the grounds that further substantial changes will not be possible. This independent assessment will usually be external, independent review for both a substantial grant award from a non-commercial or government funder and ethics approval.
